# Supplementary material
Source: publisher figshare collection journal article supplement (https://gsajournals.figshare.com/ndownloader/files/15037709)
Supplement: Supplementary file 1 [file 15037709]

## Sheet: all target genes
File S2. Annotation of the A. thaliana genetic targets of B. cinerea hotspots. Columns include the B. cinerea hotspot SNP and the nearest B. cinerea gene, and the A. thaliana target gene.
hotspot SNP	hotspot gene	target gene
1_629157	Bcin01g01610	AT1G01540
1_629157	Bcin01g01610	AT1G01970
1_629157	Bcin01g01610	AT1G03160
1_629157	Bcin01g01610	AT1G03310
1_629157	Bcin01g01610	AT1G03830
1_629157	Bcin01g01610	AT1G04420
1_629157	Bcin01g01610	AT1G06680
1_629157	Bcin01g01610	AT1G08610
1_629157	Bcin01g01610	AT1G11860
1_629157	Bcin01g01610	AT1G12800
1_629157	Bcin01g01610	AT1G13170
1_629157	Bcin01g01610	AT1G13980
1_629157	Bcin01g01610	AT1G14030
1_629157	Bcin01g01610	AT1G15215
1_629157	Bcin01g01610	AT1G15290
1_629157	Bcin01g01610	AT1G15820
1_629157	Bcin01g01610	AT1G16780
1_629157	Bcin01g01610	AT1G17220
1_629157	Bcin01g01610	AT1G19000
1_629157	Bcin01g01610	AT1G22700
1_629157	Bcin01g01610	AT1G23740
1_629157	Bcin01g01610	AT1G24040
1_629157	Bcin01g01610	AT1G24450
1_629157	Bcin01g01610	AT1G26230
1_629157	Bcin01g01610	AT1G26650
1_629157	Bcin01g01610	AT1G28440
1_629157	Bcin01g01610	AT1G29700
1_629157	Bcin01g01610	AT1G30380
1_629157	Bcin01g01610	AT1G42970
1_629157	Bcin01g01610	AT1G48350
1_629157	Bcin01g01610	AT1G50910
1_629157	Bcin01g01610	AT1G54200
1_629157	Bcin01g01610	AT1G54350
1_629157	Bcin01g01610	AT1G54500
1_629157	Bcin01g01610	AT1G54780
1_629157	Bcin01g01610	AT1G55360
1_629157	Bcin01g01610	AT1G55490
1_629157	Bcin01g01610	AT1G56090
1_629157	Bcin01g01610	AT1G56230
1_629157	Bcin01g01610	AT1G56500
1_629157	Bcin01g01610	AT1G58290
1_629157	Bcin01g01610	AT1G60000
1_629157	Bcin01g01610	AT1G60800
1_629157	Bcin01g01610	AT1G64400
1_629157	Bcin01g01610	AT1G66430
1_629157	Bcin01g01610	AT1G68890
1_629157	Bcin01g01610	AT1G70280
1_629157	Bcin01g01610	AT1G70940
1_629157	Bcin01g01610	AT1G72030
1_629157	Bcin01g01610	AT1G72090
1_629157	Bcin01g01610	AT1G73885
1_629157	Bcin01g01610	AT1G75130
1_629157	Bcin01g01610	AT1G77131
1_629157	Bcin01g01610	AT1G78060
1_629157	Bcin01g01610	AT1G79500
1_629157	Bcin01g01610	AT1G79560
1_629157	Bcin01g01610	AT2G01080
1_629157	Bcin01g01610	AT2G03890
1_629157	Bcin01g01610	AT2G05920
1_629157	Bcin01g01610	AT2G13440
1_629157	Bcin01g01610	AT2G17150
1_629157	Bcin01g01610	AT2G21340
1_629157	Bcin01g01610	AT2G24270
1_629157	Bcin01g01610	AT2G24290
1_629157	Bcin01g01610	AT2G25480
1_629157	Bcin01g01610	AT2G26730
1_629157	Bcin01g01610	AT2G27040
1_629157	Bcin01g01610	AT2G27060
1_629157	Bcin01g01610	AT2G28000
1_629157	Bcin01g01610	AT2G28070
1_629157	Bcin01g01610	AT2G28150
1_629157	Bcin01g01610	AT2G28550
1_629157	Bcin01g01610	AT2G29630
1_629157	Bcin01g01610	AT2G33500
1_629157	Bcin01g01610	AT2G33800
1_629157	Bcin01g01610	AT2G35470
1_629157	Bcin01g01610	AT2G35500
1_629157	Bcin01g01610	AT2G35780
1_629157	Bcin01g01610	AT2G35950
1_629157	Bcin01g01610	AT2G36000
1_629157	Bcin01g01610	AT2G36145
1_629157	Bcin01g01610	AT2G36350
1_629157	Bcin01g01610	AT2G36390
1_629157	Bcin01g01610	AT2G36990
1_629157	Bcin01g01610	AT2G37050
1_629157	Bcin01g01610	AT2G37330
1_629157	Bcin01g01610	AT2G37790
1_629157	Bcin01g01610	AT2G37860
1_629157	Bcin01g01610	AT2G38630
1_629157	Bcin01g01610	AT2G39670
1_629157	Bcin01g01610	AT2G39930
1_629157	Bcin01g01610	AT2G40640
1_629157	Bcin01g01610	AT2G42600
1_629157	Bcin01g01610	AT2G43800
1_629157	Bcin01g01610	AT2G44640
1_629157	Bcin01g01610	AT2G45340
1_629157	Bcin01g01610	AT2G47450
1_629157	Bcin01g01610	AT2G47590
1_629157	Bcin01g01610	AT3G01480
1_629157	Bcin01g01610	AT3G02060
1_629157	Bcin01g01610	AT3G02250
1_629157	Bcin01g01610	AT3G02690
1_629157	Bcin01g01610	AT3G04340
1_629157	Bcin01g01610	AT3G05910
1_629157	Bcin01g01610	AT3G06430
1_629157	Bcin01g01610	AT3G06440
1_629157	Bcin01g01610	AT3G06570
1_629157	Bcin01g01610	AT3G07410
1_629157	Bcin01g01610	AT3G07670
1_629157	Bcin01g01610	AT3G07990
1_629157	Bcin01g01610	AT3G08680
1_629157	Bcin01g01610	AT3G10160
1_629157	Bcin01g01610	AT3G12690
1_629157	Bcin01g01610	AT3G12780
1_629157	Bcin01g01610	AT3G13510
1_629157	Bcin01g01610	AT3G14120
1_629157	Bcin01g01610	AT3G14240
1_629157	Bcin01g01610	AT3G14650
1_629157	Bcin01g01610	AT3G15480
1_629157	Bcin01g01610	AT3G16290
1_629157	Bcin01g01610	AT3G17330
1_629157	Bcin01g01610	AT3G18050
1_629157	Bcin01g01610	AT3G18110
1_629157	Bcin01g01610	AT3G18160
1_629157	Bcin01g01610	AT3G18490
1_629157	Bcin01g01610	AT3G18680
1_629157	Bcin01g01610	AT3G18890
1_629157	Bcin01g01610	AT3G19120
1_629157	Bcin01g01610	AT3G19720
1_629157	Bcin01g01610	AT3G19820
1_629157	Bcin01g01610	AT3G20100
1_629157	Bcin01g01610	AT3G22780
1_629157	Bcin01g01610	AT3G24660
1_629157	Bcin01g01610	AT3G26300
1_629157	Bcin01g01610	AT3G29320
1_629157	Bcin01g01610	AT3G46550
1_629157	Bcin01g01610	AT3G46780
1_629157	Bcin01g01610	AT3G46970
1_629157	Bcin01g01610	AT3G47650
1_629157	Bcin01g01610	AT3G49290
1_629157	Bcin01g01610	AT3G49500
1_629157	Bcin01g01610	AT3G52750
1_629157	Bcin01g01610	AT3G52940
1_629157	Bcin01g01610	AT3G55800
1_629157	Bcin01g01610	AT3G56130
1_629157	Bcin01g01610	AT3G56370
1_629157	Bcin01g01610	AT3G56940
1_629157	Bcin01g01610	AT3G56960
1_629157	Bcin01g01610	AT3G58690
1_629157	Bcin01g01610	AT3G59400
1_629157	Bcin01g01610	AT3G59780
1_629157	Bcin01g01610	AT3G62110
1_629157	Bcin01g01610	AT3G63140
1_629157	Bcin01g01610	AT4G00150
1_629157	Bcin01g01610	AT4G00520
1_629157	Bcin01g01610	AT4G01030
1_629157	Bcin01g01610	AT4G01050
1_629157	Bcin01g01610	AT4G03150
1_629157	Bcin01g01610	AT4G04340
1_629157	Bcin01g01610	AT4G04640
1_629157	Bcin01g01610	AT4G04850
1_629157	Bcin01g01610	AT4G04890
1_629157	Bcin01g01610	AT4G05180
1_629157	Bcin01g01610	AT4G13990
1_629157	Bcin01g01610	AT4G14605
1_629157	Bcin01g01610	AT4G16400
1_629157	Bcin01g01610	AT4G18060
1_629157	Bcin01g01610	AT4G18370
1_629157	Bcin01g01610	AT4G18480
1_629157	Bcin01g01610	AT4G20130
1_629157	Bcin01g01610	AT4G20310
1_629157	Bcin01g01610	AT4G22130
1_629157	Bcin01g01610	AT4G23790
1_629157	Bcin01g01610	AT4G26620
1_629157	Bcin01g01610	AT4G26760
1_629157	Bcin01g01610	AT4G27440
1_629157	Bcin01g01610	AT4G30020
1_629157	Bcin01g01610	AT4G32410
1_629157	Bcin01g01610	AT4G37480
1_629157	Bcin01g01610	AT4G39040
1_629157	Bcin01g01610	AT4G39400
1_629157	Bcin01g01610	AT5G01590
1_629157	Bcin01g01610	AT5G04110
1_629157	Bcin01g01610	AT5G06510
1_629157	Bcin01g01610	AT5G08400
1_629157	Bcin01g01610	AT5G10690
1_629157	Bcin01g01610	AT5G11450
1_629157	Bcin01g01610	AT5G11580
1_629157	Bcin01g01610	AT5G12150
1_629157	Bcin01g01610	AT5G13630
1_629157	Bcin01g01610	AT5G16715
1_629157	Bcin01g01610	AT5G16810
1_629157	Bcin01g01610	AT5G17600
1_629157	Bcin01g01610	AT5G19670
1_629157	Bcin01g01610	AT5G23060
1_629157	Bcin01g01610	AT5G23310
1_629157	Bcin01g01610	AT5G24300
1_629157	Bcin01g01610	AT5G24310
1_629157	Bcin01g01610	AT5G26570
1_629157	Bcin01g01610	AT5G33280
1_629157	Bcin01g01610	AT5G36170
1_629157	Bcin01g01610	AT5G39410
1_629157	Bcin01g01610	AT5G39830
1_629157	Bcin01g01610	AT5G42480
1_629157	Bcin01g01610	AT5G43600
1_629157	Bcin01g01610	AT5G44530
1_629157	Bcin01g01610	AT5G44650
1_629157	Bcin01g01610	AT5G46390
1_629157	Bcin01g01610	AT5G47630
1_629157	Bcin01g01610	AT5G47800
1_629157	Bcin01g01610	AT5G50375
1_629157	Bcin01g01610	AT5G51820
1_629157	Bcin01g01610	AT5G54770
1_629157	Bcin01g01610	AT5G57030
1_629157	Bcin01g01610	AT5G58250
1_629157	Bcin01g01610	AT5G59010
1_629157	Bcin01g01610	AT5G66190
1_629157	Bcin01g01610	AT5G66420
1_629157	Bcin01g01610	AT5G66470
10_2268522	Bcin10g05900	AT1G01050
10_2268522	Bcin10g05900	AT1G07720
10_2268522	Bcin10g05900	AT1G08180
10_2268522	Bcin10g05900	AT1G10380
10_2268522	Bcin10g05900	AT1G11150
10_2268522	Bcin10g05900	AT1G17370
10_2268522	Bcin10g05900	AT1G17940
10_2268522	Bcin10g05900	AT1G18610
10_2268522	Bcin10g05900	AT1G20560
10_2268522	Bcin10g05900	AT1G21780
10_2268522	Bcin10g05900	AT1G22750
10_2268522	Bcin10g05900	AT1G25145
10_2268522	Bcin10g05900	AT1G27950
10_2268522	Bcin10g05900	AT1G36070
10_2268522	Bcin10g05900	AT1G36160
10_2268522	Bcin10g05900	AT1G42960
10_2268522	Bcin10g05900	AT1G45249
10_2268522	Bcin10g05900	AT1G53280
10_2268522	Bcin10g05900	AT1G56580
10_2268522	Bcin10g05900	AT1G62050
10_2268522	Bcin10g05900	AT1G62250
10_2268522	Bcin10g05900	AT1G67300
10_2268522	Bcin10g05900	AT1G67660
10_2268522	Bcin10g05900	AT1G68080
10_2268522	Bcin10g05900	AT1G68530
10_2268522	Bcin10g05900	AT1G69295
10_2268522	Bcin10g05900	AT1G74410
10_2268522	Bcin10g05900	AT1G76860
10_2268522	Bcin10g05900	AT1G78882
10_2268522	Bcin10g05900	AT1G79630
10_2268522	Bcin10g05900	AT1G80030
10_2268522	Bcin10g05900	AT2G01110
10_2268522	Bcin10g05900	AT2G20100
10_2268522	Bcin10g05900	AT2G20724
10_2268522	Bcin10g05900	AT2G21170
10_2268522	Bcin10g05900	AT2G22080
10_2268522	Bcin10g05900	AT2G23980
10_2268522	Bcin10g05900	AT2G30700
10_2268522	Bcin10g05900	AT2G32810
10_2268522	Bcin10g05900	AT2G36910
10_2268522	Bcin10g05900	AT2G39940
10_2268522	Bcin10g05900	AT2G40920
10_2268522	Bcin10g05900	AT2G43710
10_2268522	Bcin10g05900	AT2G44940
10_2268522	Bcin10g05900	AT2G45960
10_2268522	Bcin10g05900	AT2G45990
10_2268522	Bcin10g05900	AT2G46270
10_2268522	Bcin10g05900	AT2G46920
10_2268522	Bcin10g05900	AT2G47850
10_2268522	Bcin10g05900	AT3G01590
10_2268522	Bcin10g05900	AT3G02540
10_2268522	Bcin10g05900	AT3G04020
10_2268522	Bcin10g05900	AT3G05935
10_2268522	Bcin10g05900	AT3G11670
10_2268522	Bcin10g05900	AT3G13040
10_2268522	Bcin10g05900	AT3G15350
10_2268522	Bcin10g05900	AT3G15410
10_2268522	Bcin10g05900	AT3G15940
10_2268522	Bcin10g05900	AT3G16200
10_2268522	Bcin10g05900	AT3G19290
10_2268522	Bcin10g05900	AT3G20300
10_2268522	Bcin10g05900	AT3G23910
10_2268522	Bcin10g05900	AT3G28730
10_2268522	Bcin10g05900	AT3G44020
10_2268522	Bcin10g05900	AT3G51980
10_2268522	Bcin10g05900	AT3G53420
10_2268522	Bcin10g05900	AT3G54020
10_2268522	Bcin10g05900	AT3G54200
10_2268522	Bcin10g05900	AT3G55005
10_2268522	Bcin10g05900	AT3G55610
10_2268522	Bcin10g05900	AT3G58670
10_2268522	Bcin10g05900	AT3G61420
10_2268522	Bcin10g05900	AT3G61890
10_2268522	Bcin10g05900	AT3G62660
10_2268522	Bcin10g05900	AT3G62700
10_2268522	Bcin10g05900	AT3G62800
10_2268522	Bcin10g05900	AT4G00040
10_2268522	Bcin10g05900	AT4G12310
10_2268522	Bcin10g05900	AT4G12460
10_2268522	Bcin10g05900	AT4G15110
10_2268522	Bcin10g05900	AT4G16180
10_2268522	Bcin10g05900	AT4G16765
10_2268522	Bcin10g05900	AT4G23630
10_2268522	Bcin10g05900	AT4G25290
10_2268522	Bcin10g05900	AT4G30960
10_2268522	Bcin10g05900	AT4G31590
10_2268522	Bcin10g05900	AT4G33700
10_2268522	Bcin10g05900	AT4G34000
10_2268522	Bcin10g05900	AT4G36190
10_2268522	Bcin10g05900	AT4G37270
10_2268522	Bcin10g05900	AT4G38730
10_2268522	Bcin10g05900	AT4G39100
10_2268522	Bcin10g05900	AT4G39730
10_2268522	Bcin10g05900	AT5G03190
10_2268522	Bcin10g05900	AT5G06280
10_2268522	Bcin10g05900	AT5G08410
10_2268522	Bcin10g05900	AT5G12140
10_2268522	Bcin10g05900	AT5G16990
10_2268522	Bcin10g05900	AT5G17550
10_2268522	Bcin10g05900	AT5G19840
10_2268522	Bcin10g05900	AT5G20070
10_2268522	Bcin10g05900	AT5G20380
10_2268522	Bcin10g05900	AT5G23410
10_2268522	Bcin10g05900	AT5G37360
10_2268522	Bcin10g05900	AT5G41850
10_2268522	Bcin10g05900	AT5G42990
10_2268522	Bcin10g05900	AT5G43150
10_2268522	Bcin10g05900	AT5G47650
10_2268522	Bcin10g05900	AT5G47760
10_2268522	Bcin10g05900	AT5G59800
10_2268522	Bcin10g05900	AT5G60980
10_2268522	Bcin10g05900	AT5G62940
10_2268522	Bcin10g05900	AT5G63860
10_2268522	Bcin10g05900	AT5G64280
10_2268522	Bcin10g05900	AT5G65840
10_2268522	Bcin10g05900	AT5G66050
10_2268522	Bcin10g05900	AT5G67130
10_383007	Bcin10g00940	AT3G24770
12_115491	Bcin12g00330	AT3G19580
12_115511	Bcin12g00330	AT2G34670
12_115511	Bcin12g00330	AT3G43300
12_115511	Bcin12g00330	AT5G64220
12_758420	Bcin12g02130	AT1G02920
12_758420	Bcin12g02130	AT1G05680
12_758420	Bcin12g02130	AT1G07630
12_758420	Bcin12g02130	AT1G08800
12_758420	Bcin12g02130	AT1G09630
12_758420	Bcin12g02130	AT1G11200
12_758420	Bcin12g02130	AT1G15430
12_758420	Bcin12g02130	AT1G18480
12_758420	Bcin12g02130	AT1G19360
12_758420	Bcin12g02130	AT1G24180
12_758420	Bcin12g02130	AT1G26910
12_758420	Bcin12g02130	AT1G27760
12_758420	Bcin12g02130	AT1G30270
12_758420	Bcin12g02130	AT1G56140
12_758420	Bcin12g02130	AT1G63090
12_758420	Bcin12g02130	AT1G63220
12_758420	Bcin12g02130	AT1G68410
12_758420	Bcin12g02130	AT1G70630
12_758420	Bcin12g02130	AT1G71100
12_758420	Bcin12g02130	AT1G76600
12_758420	Bcin12g02130	AT1G77670
12_758420	Bcin12g02130	AT1G77840
12_758420	Bcin12g02130	AT1G79410
12_758420	Bcin12g02130	AT2G05260
12_758420	Bcin12g02130	AT2G13650
12_758420	Bcin12g02130	AT2G15490
12_758420	Bcin12g02130	AT2G16900
12_758420	Bcin12g02130	AT2G18690
12_758420	Bcin12g02130	AT2G24050
12_758420	Bcin12g02130	AT2G24100
12_758420	Bcin12g02130	AT2G26310
12_758420	Bcin12g02130	AT2G27500
12_758420	Bcin12g02130	AT2G29660
12_758420	Bcin12g02130	AT2G30020
12_758420	Bcin12g02130	AT2G30060
12_758420	Bcin12g02130	AT2G30870
12_758420	Bcin12g02130	AT2G32235
12_758420	Bcin12g02130	AT2G34070
12_758420	Bcin12g02130	AT2G34500
12_758420	Bcin12g02130	AT2G36950
12_758420	Bcin12g02130	AT2G38360
12_758420	Bcin12g02130	AT2G41110
12_758420	Bcin12g02130	AT2G41740
12_758420	Bcin12g02130	AT2G44070
12_758420	Bcin12g02130	AT3G05390
12_758420	Bcin12g02130	AT3G06300
12_758420	Bcin12g02130	AT3G07080
12_758420	Bcin12g02130	AT3G07810
12_758420	Bcin12g02130	AT3G09440
12_758420	Bcin12g02130	AT3G09570
12_758420	Bcin12g02130	AT3G10640
12_758420	Bcin12g02130	AT3G13100
12_758420	Bcin12g02130	AT3G15060
12_758420	Bcin12g02130	AT3G16270
12_758420	Bcin12g02130	AT3G16760
12_758420	Bcin12g02130	AT3G19130
12_758420	Bcin12g02130	AT3G20860
12_758420	Bcin12g02130	AT3G22890
12_758420	Bcin12g02130	AT3G23150
12_758420	Bcin12g02130	AT3G23530
12_758420	Bcin12g02130	AT3G44110
12_758420	Bcin12g02130	AT3G48890
12_758420	Bcin12g02130	AT3G52540
12_758420	Bcin12g02130	AT3G55430
12_758420	Bcin12g02130	AT3G56200
12_758420	Bcin12g02130	AT3G57380
12_758420	Bcin12g02130	AT4G02940
12_758420	Bcin12g02130	AT4G04610
12_758420	Bcin12g02130	AT4G12250
12_758420	Bcin12g02130	AT4G13920
12_758420	Bcin12g02130	AT4G15610
12_758420	Bcin12g02130	AT4G17070
12_758420	Bcin12g02130	AT4G17720
12_758420	Bcin12g02130	AT4G18950
12_758420	Bcin12g02130	AT4G24160
12_758420	Bcin12g02130	AT4G25030
12_758420	Bcin12g02130	AT4G27070
12_758420	Bcin12g02130	AT4G29670
12_758420	Bcin12g02130	AT4G33430
12_758420	Bcin12g02130	AT4G33770
12_758420	Bcin12g02130	AT4G34135
12_758420	Bcin12g02130	AT4G35080
12_758420	Bcin12g02130	AT4G36480
12_758420	Bcin12g02130	AT4G38940
12_758420	Bcin12g02130	AT5G02100
12_758420	Bcin12g02130	AT5G02490
12_758420	Bcin12g02130	AT5G12930
12_758420	Bcin12g02130	AT5G13280
12_758420	Bcin12g02130	AT5G13420
12_758420	Bcin12g02130	AT5G15640
12_758420	Bcin12g02130	AT5G26667
12_758420	Bcin12g02130	AT5G26680
12_758420	Bcin12g02130	AT5G27760
12_758420	Bcin12g02130	AT5G39090
12_758420	Bcin12g02130	AT5G39320
12_758420	Bcin12g02130	AT5G41990
12_758420	Bcin12g02130	AT5G44380
12_758420	Bcin12g02130	AT5G47140
12_758420	Bcin12g02130	AT5G49480
12_758420	Bcin12g02130	AT5G54170
12_758420	Bcin12g02130	AT5G54650
12_758420	Bcin12g02130	AT5G54860
12_758420	Bcin12g02130	AT5G55200
12_758420	Bcin12g02130	AT5G56010
12_758420	Bcin12g02130	AT5G59550
12_758420	Bcin12g02130	AT5G61780
12_758420	Bcin12g02130	AT5G62180
12_758420	Bcin12g02130	AT5G62620
12_758420	Bcin12g02130	AT5G67510
12_758420	Bcin12g02130	ATMG00160
12_760499	Bcin12g02130	AT1G03060
12_760499	Bcin12g02130	AT1G04970
12_760499	Bcin12g02130	AT1G05010
12_760499	Bcin12g02130	AT1G07810
12_760499	Bcin12g02130	AT1G08290
12_760499	Bcin12g02130	AT1G10657
12_760499	Bcin12g02130	AT1G11580
12_760499	Bcin12g02130	AT1G13340
12_760499	Bcin12g02130	AT1G15520
12_760499	Bcin12g02130	AT1G17020
12_760499	Bcin12g02130	AT1G17380
12_760499	Bcin12g02130	AT1G19180
12_760499	Bcin12g02130	AT1G25083
12_760499	Bcin12g02130	AT1G29290
12_760499	Bcin12g02130	AT1G30620
12_760499	Bcin12g02130	AT1G30700
12_760499	Bcin12g02130	AT1G44800
12_760499	Bcin12g02130	AT1G51710
12_760499	Bcin12g02130	AT1G51760
12_760499	Bcin12g02130	AT1G52890
12_760499	Bcin12g02130	AT1G54130
12_760499	Bcin12g02130	AT1G54820
12_760499	Bcin12g02130	AT1G63440
12_760499	Bcin12g02130	AT1G64140
12_760499	Bcin12g02130	AT1G64142
12_760499	Bcin12g02130	AT1G66700
12_760499	Bcin12g02130	AT1G67810
12_760499	Bcin12g02130	AT1G68620
12_760499	Bcin12g02130	AT1G68820
12_760499	Bcin12g02130	AT1G70700
12_760499	Bcin12g02130	AT1G72800
12_760499	Bcin12g02130	AT1G73080
12_760499	Bcin12g02130	AT1G73810
12_760499	Bcin12g02130	AT1G79930
12_760499	Bcin12g02130	AT2G03750
12_760499	Bcin12g02130	AT2G04040
12_760499	Bcin12g02130	AT2G04050
12_760499	Bcin12g02130	AT2G06050
12_760499	Bcin12g02130	AT2G15760
12_760499	Bcin12g02130	AT2G16430
12_760499	Bcin12g02130	AT2G16660
12_760499	Bcin12g02130	AT2G17720
12_760499	Bcin12g02130	AT2G18000
12_760499	Bcin12g02130	AT2G19450
12_760499	Bcin12g02130	AT2G22010
12_760499	Bcin12g02130	AT2G23150
12_760499	Bcin12g02130	AT2G23170
12_760499	Bcin12g02130	AT2G24490
12_760499	Bcin12g02130	AT2G24500
12_760499	Bcin12g02130	AT2G25680
12_760499	Bcin12g02130	AT2G29350
12_760499	Bcin12g02130	AT2G29470
12_760499	Bcin12g02130	AT2G30140
12_760499	Bcin12g02130	AT2G30770
12_760499	Bcin12g02130	AT2G30790
12_760499	Bcin12g02130	AT2G31945
12_760499	Bcin12g02130	AT2G34810
12_760499	Bcin12g02130	AT2G37750
12_760499	Bcin12g02130	AT2G41940
12_760499	Bcin12g02130	AT2G42010
12_760499	Bcin12g02130	AT2G43000
12_760499	Bcin12g02130	AT2G44970
12_760499	Bcin12g02130	AT2G45570
12_760499	Bcin12g02130	AT2G46170
12_760499	Bcin12g02130	AT2G47650
12_760499	Bcin12g02130	AT3G04010
12_760499	Bcin12g02130	AT3G04720
12_760499	Bcin12g02130	AT3G06500
12_760499	Bcin12g02130	AT3G09090
12_760499	Bcin12g02130	AT3G10050
12_760499	Bcin12g02130	AT3G10320
12_760499	Bcin12g02130	AT3G12510
12_760499	Bcin12g02130	AT3G13330
12_760499	Bcin12g02130	AT3G14020
12_760499	Bcin12g02130	AT3G14050
12_760499	Bcin12g02130	AT3G15356
12_760499	Bcin12g02130	AT3G15500
12_760499	Bcin12g02130	AT3G16530
12_760499	Bcin12g02130	AT3G17770
12_760499	Bcin12g02130	AT3G21260
12_760499	Bcin12g02130	AT3G22160
12_760499	Bcin12g02130	AT3G26090
12_760499	Bcin12g02130	AT3G26830
12_760499	Bcin12g02130	AT3G26840
12_760499	Bcin12g02130	AT3G26932
12_760499	Bcin12g02130	AT3G44300
12_760499	Bcin12g02130	AT3G44860
12_760499	Bcin12g02130	AT3G45160
12_760499	Bcin12g02130	AT3G46658
12_760499	Bcin12g02130	AT3G46660
12_760499	Bcin12g02130	AT3G49110
12_760499	Bcin12g02130	AT3G49120
12_760499	Bcin12g02130	AT3G49210
12_760499	Bcin12g02130	AT3G50260
12_760499	Bcin12g02130	AT3G51860
12_760499	Bcin12g02130	AT3G53180
12_760499	Bcin12g02130	AT3G56160
12_760499	Bcin12g02130	AT3G59140
12_760499	Bcin12g02130	AT3G60130
12_760499	Bcin12g02130	AT3G62590
12_760499	Bcin12g02130	AT4G00550
12_760499	Bcin12g02130	AT4G00900
12_760499	Bcin12g02130	AT4G01360
12_760499	Bcin12g02130	AT4G01870
12_760499	Bcin12g02130	AT4G02350
12_760499	Bcin12g02130	AT4G08510
12_760499	Bcin12g02130	AT4G09030
12_760499	Bcin12g02130	AT4G12735
12_760499	Bcin12g02130	AT4G13395
12_760499	Bcin12g02130	AT4G13500
12_760499	Bcin12g02130	AT4G14950
12_760499	Bcin12g02130	AT4G15955
12_760499	Bcin12g02130	AT4G16260
12_760499	Bcin12g02130	AT4G16680
12_760499	Bcin12g02130	AT4G17230
12_760499	Bcin12g02130	AT4G18360
12_760499	Bcin12g02130	AT4G18740
12_760499	Bcin12g02130	AT4G18800
12_760499	Bcin12g02130	AT4G22470
12_760499	Bcin12g02130	AT4G22920
12_760499	Bcin12g02130	AT4G24000
12_760499	Bcin12g02130	AT4G24830
12_760499	Bcin12g02130	AT4G28600
12_760499	Bcin12g02130	AT4G30260
12_760499	Bcin12g02130	AT4G30780
12_760499	Bcin12g02130	AT4G34200
12_760499	Bcin12g02130	AT4G34390
12_760499	Bcin12g02130	AT4G34590
12_760499	Bcin12g02130	AT4G34890
12_760499	Bcin12g02130	AT4G35630
12_760499	Bcin12g02130	AT4G36270
12_760499	Bcin12g02130	AT5G01210
12_760499	Bcin12g02130	AT5G01215
12_760499	Bcin12g02130	AT5G04980
12_760499	Bcin12g02130	AT5G05600
12_760499	Bcin12g02130	AT5G05730
12_760499	Bcin12g02130	AT5G10520
12_760499	Bcin12g02130	AT5G11420
12_760499	Bcin12g02130	AT5G11650
12_760499	Bcin12g02130	AT5G12010
12_760499	Bcin12g02130	AT5G13220
12_760499	Bcin12g02130	AT5G13330
12_760499	Bcin12g02130	AT5G13760
12_760499	Bcin12g02130	AT5G13820
12_760499	Bcin12g02130	AT5G17020
12_760499	Bcin12g02130	AT5G18400
12_760499	Bcin12g02130	AT5G19550
12_760499	Bcin12g02130	AT5G20230
12_760499	Bcin12g02130	AT5G20830
12_760499	Bcin12g02130	AT5G22350
12_760499	Bcin12g02130	AT5G27300
12_760499	Bcin12g02130	AT5G40460
12_760499	Bcin12g02130	AT5G44480
12_760499	Bcin12g02130	AT5G49520
12_760499	Bcin12g02130	AT5G50370
12_760499	Bcin12g02130	AT5G53750
12_760499	Bcin12g02130	AT5G54145
12_760499	Bcin12g02130	AT5G54960
12_760499	Bcin12g02130	AT5G57480
12_760499	Bcin12g02130	AT5G59662
12_760499	Bcin12g02130	AT5G61160
12_760499	Bcin12g02130	AT5G62680
12_760499	Bcin12g02130	AT5G66100
12_760499	Bcin12g02130	AT5G67310
12_760499	Bcin12g02130	ATMG01080
12_842369	Bcin12g02340	AT1G01340
12_842369	Bcin12g02340	AT1G02170
12_842369	Bcin12g02340	AT1G02930
12_842369	Bcin12g02340	AT1G04340
12_842369	Bcin12g02340	AT1G04980
12_842369	Bcin12g02340	AT1G06180
12_842369	Bcin12g02340	AT1G06290
12_842369	Bcin12g02340	AT1G06620
12_842369	Bcin12g02340	AT1G07140
12_842369	Bcin12g02340	AT1G07890
12_842369	Bcin12g02340	AT1G08250
12_842369	Bcin12g02340	AT1G09070
12_842369	Bcin12g02340	AT1G09210
12_842369	Bcin12g02340	AT1G09270
12_842369	Bcin12g02340	AT1G09330
12_842369	Bcin12g02340	AT1G09560
12_842369	Bcin12g02340	AT1G09780
12_842369	Bcin12g02340	AT1G09970
12_842369	Bcin12g02340	AT1G10040
12_842369	Bcin12g02340	AT1G10290
12_842369	Bcin12g02340	AT1G10410
12_842369	Bcin12g02340	AT1G10630
12_842369	Bcin12g02340	AT1G15110
12_842369	Bcin12g02340	AT1G18210
12_842369	Bcin12g02340	AT1G18900
12_842369	Bcin12g02340	AT1G19670
12_842369	Bcin12g02340	AT1G20200
12_842369	Bcin12g02340	AT1G20510
12_842369	Bcin12g02340	AT1G21900
12_842369	Bcin12g02340	AT1G22020
12_842369	Bcin12g02340	AT1G22400
12_842369	Bcin12g02340	AT1G22410
12_842369	Bcin12g02340	AT1G23050
12_842369	Bcin12g02340	AT1G23440
12_842369	Bcin12g02340	AT1G23490
12_842369	Bcin12g02340	AT1G23830
12_842369	Bcin12g02340	AT1G25370
12_842369	Bcin12g02340	AT1G27000
12_842369	Bcin12g02340	AT1G27130
12_842369	Bcin12g02340	AT1G27970
12_842369	Bcin12g02340	AT1G28210
12_842369	Bcin12g02340	AT1G28320
12_842369	Bcin12g02340	AT1G29120
12_842369	Bcin12g02340	AT1G29150
12_842369	Bcin12g02340	AT1G29310
12_842369	Bcin12g02340	AT1G29330
12_842369	Bcin12g02340	AT1G29460
12_842369	Bcin12g02340	AT1G30400
12_842369	Bcin12g02340	AT1G32380
12_842369	Bcin12g02340	AT1G32460
12_842369	Bcin12g02340	AT1G32940
12_842369	Bcin12g02340	AT1G37130
12_842369	Bcin12g02340	AT1G42990
12_842369	Bcin12g02340	AT1G43690
12_842369	Bcin12g02340	AT1G44170
12_842369	Bcin12g02340	AT1G44350
12_842369	Bcin12g02340	AT1G45145
12_842369	Bcin12g02340	AT1G47820
12_842369	Bcin12g02340	AT1G48370
12_842369	Bcin12g02340	AT1G48850
12_842369	Bcin12g02340	AT1G49130
12_842369	Bcin12g02340	AT1G50740
12_842369	Bcin12g02340	AT1G51980
12_842369	Bcin12g02340	AT1G52080
12_842369	Bcin12g02340	AT1G52565
12_842369	Bcin12g02340	AT1G53250
12_842369	Bcin12g02340	AT1G53760
12_842369	Bcin12g02340	AT1G54030
12_842369	Bcin12g02340	AT1G54270
12_842369	Bcin12g02340	AT1G54700
12_842369	Bcin12g02340	AT1G54990
12_842369	Bcin12g02340	AT1G55920
12_842369	Bcin12g02340	AT1G56340
12_842369	Bcin12g02340	AT1G57630
12_842369	Bcin12g02340	AT1G59710
12_842369	Bcin12g02340	AT1G59820
12_842369	Bcin12g02340	AT1G60730
12_842369	Bcin12g02340	AT1G60740
12_842369	Bcin12g02340	AT1G61250
12_842369	Bcin12g02340	AT1G61740
12_842369	Bcin12g02340	AT1G62380
12_842369	Bcin12g02340	AT1G62790
12_842369	Bcin12g02340	AT1G65690
12_842369	Bcin12g02340	AT1G65820
12_842369	Bcin12g02340	AT1G65840
12_842369	Bcin12g02340	AT1G66580
12_842369	Bcin12g02340	AT1G66680
12_842369	Bcin12g02340	AT1G69870
12_842369	Bcin12g02340	AT1G70780
12_842369	Bcin12g02340	AT1G70782
12_842369	Bcin12g02340	AT1G72120
12_842369	Bcin12g02340	AT1G72470
12_842369	Bcin12g02340	AT1G74950
12_842369	Bcin12g02340	AT1G75170
12_842369	Bcin12g02340	AT1G75270
12_842369	Bcin12g02340	AT1G75450
12_842369	Bcin12g02340	AT1G76970
12_842369	Bcin12g02340	AT1G77500
12_842369	Bcin12g02340	AT1G78380
12_842369	Bcin12g02340	AT1G78570
12_842369	Bcin12g02340	AT1G79450
12_842369	Bcin12g02340	AT1G80300
12_842369	Bcin12g02340	AT1G80950
12_842369	Bcin12g02340	AT2G01330
12_842369	Bcin12g02340	AT2G01480
12_842369	Bcin12g02340	AT2G02810
12_842369	Bcin12g02340	AT2G02860
12_842369	Bcin12g02340	AT2G03120
12_842369	Bcin12g02340	AT2G04400
12_842369	Bcin12g02340	AT2G05710
12_842369	Bcin12g02340	AT2G05940
12_842369	Bcin12g02340	AT2G11520
12_842369	Bcin12g02340	AT2G15220
12_842369	Bcin12g02340	AT2G16280
12_842369	Bcin12g02340	AT2G16510
12_842369	Bcin12g02340	AT2G16950
12_842369	Bcin12g02340	AT2G17130
12_842369	Bcin12g02340	AT2G17290
12_842369	Bcin12g02340	AT2G17420
12_842369	Bcin12g02340	AT2G17500
12_842369	Bcin12g02340	AT2G17760
12_842369	Bcin12g02340	AT2G18090
12_842369	Bcin12g02340	AT2G19160
12_842369	Bcin12g02340	AT2G20010
12_842369	Bcin12g02340	AT2G20420
12_842369	Bcin12g02340	AT2G20760
12_842369	Bcin12g02340	AT2G20950
12_842369	Bcin12g02340	AT2G21190
12_842369	Bcin12g02340	AT2G21620
12_842369	Bcin12g02340	AT2G23810
12_842369	Bcin12g02340	AT2G24200
12_842369	Bcin12g02340	AT2G27510
12_842369	Bcin12g02340	AT2G28320
12_842369	Bcin12g02340	AT2G29460
12_842369	Bcin12g02340	AT2G29990
12_842369	Bcin12g02340	AT2G30040
12_842369	Bcin12g02340	AT2G30050
12_842369	Bcin12g02340	AT2G30360
12_842369	Bcin12g02340	AT2G30550
12_842369	Bcin12g02340	AT2G31390
12_842369	Bcin12g02340	AT2G31400
12_842369	Bcin12g02340	AT2G31955
12_842369	Bcin12g02340	AT2G32140
12_842369	Bcin12g02340	AT2G33700
12_842369	Bcin12g02340	AT2G34250
12_842369	Bcin12g02340	AT2G34355
12_842369	Bcin12g02340	AT2G34660
12_842369	Bcin12g02340	AT2G36300
12_842369	Bcin12g02340	AT2G36530
12_842369	Bcin12g02340	AT2G36580
12_842369	Bcin12g02340	AT2G36880
12_842369	Bcin12g02340	AT2G37110
12_842369	Bcin12g02340	AT2G37760
12_842369	Bcin12g02340	AT2G37770
12_842369	Bcin12g02340	AT2G38610
12_842369	Bcin12g02340	AT2G39650
12_842369	Bcin12g02340	AT2G39970
12_842369	Bcin12g02340	AT2G40730
12_842369	Bcin12g02340	AT2G40820
12_842369	Bcin12g02340	AT2G41420
12_842369	Bcin12g02340	AT2G41830
12_842369	Bcin12g02340	AT2G42520
12_842369	Bcin12g02340	AT2G43020
12_842369	Bcin12g02340	AT2G43320
12_842369	Bcin12g02340	AT2G44350
12_842369	Bcin12g02340	AT2G44520
12_842369	Bcin12g02340	AT2G45070
12_842369	Bcin12g02340	AT2G45290
12_842369	Bcin12g02340	AT2G45300
12_842369	Bcin12g02340	AT2G45680
12_842369	Bcin12g02340	AT2G46500
12_842369	Bcin12g02340	AT2G47190
12_842369	Bcin12g02340	AT2G47510
12_842369	Bcin12g02340	AT2G47800
12_842369	Bcin12g02340	AT3G01120
12_842369	Bcin12g02340	AT3G01142
12_842369	Bcin12g02340	AT3G01640
12_842369	Bcin12g02340	AT3G02230
12_842369	Bcin12g02340	AT3G02360
12_842369	Bcin12g02340	AT3G02520
12_842369	Bcin12g02340	AT3G02875
12_842369	Bcin12g02340	AT3G02880
12_842369	Bcin12g02340	AT3G04000
12_842369	Bcin12g02340	AT3G04080
12_842369	Bcin12g02340	AT3G04120
12_842369	Bcin12g02340	AT3G05050
12_842369	Bcin12g02340	AT3G05200
12_842369	Bcin12g02340	AT3G05230
12_842369	Bcin12g02340	AT3G05360
12_842369	Bcin12g02340	AT3G05500
12_842369	Bcin12g02340	AT3G05545
12_842369	Bcin12g02340	AT3G05710
12_842369	Bcin12g02340	AT3G06350
12_842369	Bcin12g02340	AT3G06860
12_842369	Bcin12g02340	AT3G07480
12_842369	Bcin12g02340	AT3G07720
12_842369	Bcin12g02340	AT3G08580
12_842369	Bcin12g02340	AT3G08630
12_842369	Bcin12g02340	AT3G08640
12_842369	Bcin12g02340	AT3G08760
12_842369	Bcin12g02340	AT3G09810
12_842369	Bcin12g02340	AT3G10500
12_842369	Bcin12g02340	AT3G10985
12_842369	Bcin12g02340	AT3G11200
12_842369	Bcin12g02340	AT3G11320
12_842369	Bcin12g02340	AT3G11330
12_842369	Bcin12g02340	AT3G12740
12_842369	Bcin12g02340	AT3G12800
12_842369	Bcin12g02340	AT3G13050
12_842369	Bcin12g02340	AT3G13110
12_842369	Bcin12g02340	AT3G13310
12_842369	Bcin12g02340	AT3G13930
12_842369	Bcin12g02340	AT3G14990
12_842369	Bcin12g02340	AT3G17240
12_842369	Bcin12g02340	AT3G17250
12_842369	Bcin12g02340	AT3G18830
12_842369	Bcin12g02340	AT3G18950
12_842369	Bcin12g02340	AT3G20800
12_842369	Bcin12g02340	AT3G21690
12_842369	Bcin12g02340	AT3G22370
12_842369	Bcin12g02340	AT3G22600
12_842369	Bcin12g02340	AT3G22950
12_842369	Bcin12g02340	AT3G23570
12_842369	Bcin12g02340	AT3G24170
12_842369	Bcin12g02340	AT3G24550
12_842369	Bcin12g02340	AT3G27240
12_842369	Bcin12g02340	AT3G27380
12_842369	Bcin12g02340	AT3G29360
12_842369	Bcin12g02340	AT3G44720
12_842369	Bcin12g02340	AT3G45040
12_842369	Bcin12g02340	AT3G45620
12_842369	Bcin12g02340	AT3G46130
12_842369	Bcin12g02340	AT3G46670
12_842369	Bcin12g02340	AT3G47520
12_842369	Bcin12g02340	AT3G48850
12_842369	Bcin12g02340	AT3G48990
12_842369	Bcin12g02340	AT3G49390
12_842369	Bcin12g02340	AT3G50900
12_842369	Bcin12g02340	AT3G50910
12_842369	Bcin12g02340	AT3G51160
12_842369	Bcin12g02340	AT3G51460
12_842369	Bcin12g02340	AT3G51790
12_842369	Bcin12g02340	AT3G52930
12_842369	Bcin12g02340	AT3G53580
12_842369	Bcin12g02340	AT3G54110
12_842369	Bcin12g02340	AT3G54640
12_842369	Bcin12g02340	AT3G55410
12_842369	Bcin12g02340	AT3G55620
12_842369	Bcin12g02340	AT3G57090
12_842369	Bcin12g02340	AT3G57280
12_842369	Bcin12g02340	AT3G58510
12_842369	Bcin12g02340	AT3G58750
12_842369	Bcin12g02340	AT3G58975
12_842369	Bcin12g02340	AT3G59760
12_842369	Bcin12g02340	AT3G60160
12_842369	Bcin12g02340	AT3G60200
12_842369	Bcin12g02340	AT3G60720
12_842369	Bcin12g02340	AT3G62770
12_842369	Bcin12g02340	AT3G62830
12_842369	Bcin12g02340	AT3G63010
12_842369	Bcin12g02340	AT3G63310
12_842369	Bcin12g02340	AT3G63460
12_842369	Bcin12g02340	AT3G66654
12_842369	Bcin12g02340	AT4G00380
12_842369	Bcin12g02340	AT4G01810
12_842369	Bcin12g02340	AT4G02520
12_842369	Bcin12g02340	AT4G03420
12_842369	Bcin12g02340	AT4G03450
12_842369	Bcin12g02340	AT4G03550
12_842369	Bcin12g02340	AT4G04800
12_842369	Bcin12g02340	AT4G05020
12_842369	Bcin12g02340	AT4G08390
12_842369	Bcin12g02340	AT4G11370
12_842369	Bcin12g02340	AT4G11380
12_842369	Bcin12g02340	AT4G11590
12_842369	Bcin12g02340	AT4G12300
12_842369	Bcin12g02340	AT4G15120
12_842369	Bcin12g02340	AT4G16670
12_842369	Bcin12g02340	AT4G16760
12_842369	Bcin12g02340	AT4G17650
12_842369	Bcin12g02340	AT4G18010
12_842369	Bcin12g02340	AT4G19006
12_842369	Bcin12g02340	AT4G20110
12_842369	Bcin12g02340	AT4G20830
12_842369	Bcin12g02340	AT4G21445
12_842369	Bcin12g02340	AT4G23100
12_842369	Bcin12g02340	AT4G25230
12_842369	Bcin12g02340	AT4G25672
12_842369	Bcin12g02340	AT4G25700
12_842369	Bcin12g02340	AT4G26940
12_842369	Bcin12g02340	AT4G26970
12_842369	Bcin12g02340	AT4G27585
12_842369	Bcin12g02340	AT4G27595
12_842369	Bcin12g02340	AT4G27830
12_842369	Bcin12g02340	AT4G27960
12_842369	Bcin12g02340	AT4G28060
12_842369	Bcin12g02340	AT4G28370
12_842369	Bcin12g02340	AT4G28490
12_842369	Bcin12g02340	AT4G29210
12_842369	Bcin12g02340	AT4G29810
12_842369	Bcin12g02340	AT4G30890
12_842369	Bcin12g02340	AT4G31300
12_842369	Bcin12g02340	AT4G31860
12_842369	Bcin12g02340	AT4G33540
12_842369	Bcin12g02340	AT4G33920
12_842369	Bcin12g02340	AT4G34120
12_842369	Bcin12g02340	AT4G34131
12_842369	Bcin12g02340	AT4G34230
12_842369	Bcin12g02340	AT4G34588
12_842369	Bcin12g02340	AT4G34710
12_842369	Bcin12g02340	AT4G35110
12_842369	Bcin12g02340	AT4G35260
12_842369	Bcin12g02340	AT4G36220
12_842369	Bcin12g02340	AT4G36988
12_842369	Bcin12g02340	AT4G36990
12_842369	Bcin12g02340	AT4G37310
12_842369	Bcin12g02340	AT4G37370
12_842369	Bcin12g02340	AT4G38630
12_842369	Bcin12g02340	AT4G39670
12_842369	Bcin12g02340	AT4G39780
12_842369	Bcin12g02340	AT4G39990
12_842369	Bcin12g02340	AT5G01250
12_842369	Bcin12g02340	AT5G01340
12_842369	Bcin12g02340	AT5G01810
12_842369	Bcin12g02340	AT5G01850
12_842369	Bcin12g02340	AT5G03160
12_842369	Bcin12g02340	AT5G03290
12_842369	Bcin12g02340	AT5G03630
12_842369	Bcin12g02340	AT5G03780
12_842369	Bcin12g02340	AT5G04170
12_842369	Bcin12g02340	AT5G04340
12_842369	Bcin12g02340	AT5G04590
12_842369	Bcin12g02340	AT5G04920
12_842369	Bcin12g02340	AT5G04930
12_842369	Bcin12g02340	AT5G05340
12_842369	Bcin12g02340	AT5G07350
12_842369	Bcin12g02340	AT5G07730
12_842369	Bcin12g02340	AT5G08160
12_842369	Bcin12g02340	AT5G08300
12_842369	Bcin12g02340	AT5G10150
12_842369	Bcin12g02340	AT5G10840
12_842369	Bcin12g02340	AT5G11520
12_842369	Bcin12g02340	AT5G11670
12_842369	Bcin12g02340	AT5G12890
12_842369	Bcin12g02340	AT5G13110
12_842369	Bcin12g02340	AT5G13190
12_842369	Bcin12g02340	AT5G13370
12_842369	Bcin12g02340	AT5G13490
12_842369	Bcin12g02340	AT5G13550
12_842369	Bcin12g02340	AT5G14040
12_842369	Bcin12g02340	AT5G14310
12_842369	Bcin12g02340	AT5G14420
12_842369	Bcin12g02340	AT5G15090
12_842369	Bcin12g02340	AT5G15490
12_842369	Bcin12g02340	AT5G16510
12_842369	Bcin12g02340	AT5G16720
12_842369	Bcin12g02340	AT5G16910
12_842369	Bcin12g02340	AT5G17280
12_842369	Bcin12g02340	AT5G17380
12_842369	Bcin12g02340	AT5G17770
12_842369	Bcin12g02340	AT5G17860
12_842369	Bcin12g02340	AT5G17990
12_842369	Bcin12g02340	AT5G18070
12_842369	Bcin12g02340	AT5G18150
12_842369	Bcin12g02340	AT5G18480
12_842369	Bcin12g02340	AT5G19000
12_842369	Bcin12g02340	AT5G19440
12_842369	Bcin12g02340	AT5G19855
12_842369	Bcin12g02340	AT5G20000
12_842369	Bcin12g02340	AT5G20020
12_842369	Bcin12g02340	AT5G20910
12_842369	Bcin12g02340	AT5G21990
12_842369	Bcin12g02340	AT5G22060
12_842369	Bcin12g02340	AT5G22300
12_842369	Bcin12g02340	AT5G22780
12_842369	Bcin12g02340	AT5G23540
12_842369	Bcin12g02340	AT5G24430
12_842369	Bcin12g02340	AT5G24810
12_842369	Bcin12g02340	AT5G26340
12_842369	Bcin12g02340	AT5G27520
12_842369	Bcin12g02340	AT5G27600
12_842369	Bcin12g02340	AT5G28050
12_842369	Bcin12g02340	AT5G28540
12_842369	Bcin12g02340	AT5G29000
12_842369	Bcin12g02340	AT5G33290
12_842369	Bcin12g02340	AT5G35700
12_842369	Bcin12g02340	AT5G35735
12_842369	Bcin12g02340	AT5G36220
12_842369	Bcin12g02340	AT5G38530
12_842369	Bcin12g02340	AT5G38900
12_842369	Bcin12g02340	AT5G39050
12_842369	Bcin12g02340	AT5G41690
12_842369	Bcin12g02340	AT5G41992
12_842369	Bcin12g02340	AT5G42020
12_842369	Bcin12g02340	AT5G42350
12_842369	Bcin12g02340	AT5G44720
12_842369	Bcin12g02340	AT5G45410
12_842369	Bcin12g02340	AT5G47200
12_842369	Bcin12g02340	AT5G47730
12_842369	Bcin12g02340	AT5G48180
12_842369	Bcin12g02340	AT5G49570
12_842369	Bcin12g02340	AT5G50850
12_842369	Bcin12g02340	AT5G50960
12_842369	Bcin12g02340	AT5G51070
12_842369	Bcin12g02340	AT5G51570
12_842369	Bcin12g02340	AT5G51640
12_842369	Bcin12g02340	AT5G51830
12_842369	Bcin12g02340	AT5G52050
12_842369	Bcin12g02340	AT5G52450
12_842369	Bcin12g02340	AT5G53120
12_842369	Bcin12g02340	AT5G54100
12_842369	Bcin12g02340	AT5G54110
12_842369	Bcin12g02340	AT5G54500
12_842369	Bcin12g02340	AT5G54590
12_842369	Bcin12g02340	AT5G54830
12_842369	Bcin12g02340	AT5G54840
12_842369	Bcin12g02340	AT5G54870
12_842369	Bcin12g02340	AT5G55070
12_842369	Bcin12g02340	AT5G55500
12_842369	Bcin12g02340	AT5G55560
12_842369	Bcin12g02340	AT5G55610
12_842369	Bcin12g02340	AT5G56350
12_842369	Bcin12g02340	AT5G57015
12_842369	Bcin12g02340	AT5G57060
12_842369	Bcin12g02340	AT5G57890
12_842369	Bcin12g02340	AT5G57910
12_842369	Bcin12g02340	AT5G58290
12_842369	Bcin12g02340	AT5G58620
12_842369	Bcin12g02340	AT5G59820
12_842369	Bcin12g02340	AT5G60750
12_842369	Bcin12g02340	AT5G61010
12_842369	Bcin12g02340	AT5G61520
12_842369	Bcin12g02340	AT5G61790
12_842369	Bcin12g02340	AT5G62020
12_842369	Bcin12g02340	AT5G62865
12_842369	Bcin12g02340	AT5G63130
12_842369	Bcin12g02340	AT5G63490
12_842369	Bcin12g02340	AT5G63680
12_842369	Bcin12g02340	AT5G63790
12_842369	Bcin12g02340	AT5G63980
12_842369	Bcin12g02340	AT5G64020
12_842369	Bcin12g02340	AT5G64310
12_842369	Bcin12g02340	AT5G66120
12_842369	Bcin12g02340	AT5G66320
12_842369	Bcin12g02340	AT5G66760
12_842369	Bcin12g02340	AT5G67300
12_842369	Bcin12g02340	AT5G67480
12_842369	Bcin12g02340	AT5G67500
12_842369	Bcin12g02340	AT5G67600
13_1026752	Bcin13g02930	AT1G01910
13_1026752	Bcin13g02930	AT1G03220
13_1026752	Bcin13g02930	AT1G03230
13_1026752	Bcin13g02930	AT1G03370
13_1026752	Bcin13g02930	AT1G04780
13_1026752	Bcin13g02930	AT1G10140
13_1026752	Bcin13g02930	AT1G10990
13_1026752	Bcin13g02930	AT1G14170
13_1026752	Bcin13g02930	AT1G14330
13_1026752	Bcin13g02930	AT1G17090
13_1026752	Bcin13g02930	AT1G19270
13_1026752	Bcin13g02930	AT1G20970
13_1026752	Bcin13g02930	AT1G23090
13_1026752	Bcin13g02930	AT1G27500
13_1026752	Bcin13g02930	AT1G33030
13_1026752	Bcin13g02930	AT1G50360
13_1026752	Bcin13g02930	AT1G54960
13_1026752	Bcin13g02930	AT1G62200
13_1026752	Bcin13g02930	AT1G63010
13_1026752	Bcin13g02930	AT1G64385
13_1026752	Bcin13g02930	AT1G64610
13_1026752	Bcin13g02930	AT1G66690
13_1026752	Bcin13g02930	AT1G68370
13_1026752	Bcin13g02930	AT1G71140
13_1026752	Bcin13g02930	AT1G71820
13_1026752	Bcin13g02930	AT1G72540
13_1026752	Bcin13g02930	AT1G74020
13_1026752	Bcin13g02930	AT1G74640
13_1026752	Bcin13g02930	AT1G77770
13_1026752	Bcin13g02930	AT2G01850
13_1026752	Bcin13g02930	AT2G02040
13_1026752	Bcin13g02930	AT2G02180
13_1026752	Bcin13g02930	AT2G16500
13_1026752	Bcin13g02930	AT2G16920
13_1026752	Bcin13g02930	AT2G18680
13_1026752	Bcin13g02930	AT2G19880
13_1026752	Bcin13g02930	AT2G20900
13_1026752	Bcin13g02930	AT2G21120
13_1026752	Bcin13g02930	AT2G24180
13_1026752	Bcin13g02930	AT2G27200
13_1026752	Bcin13g02930	AT2G31260
13_1026752	Bcin13g02930	AT2G32250
13_1026752	Bcin13g02930	AT2G32960
13_1026752	Bcin13g02930	AT2G34080
13_1026752	Bcin13g02930	AT2G34360
13_1026752	Bcin13g02930	AT2G34630
13_1026752	Bcin13g02930	AT2G35390
13_1026752	Bcin13g02930	AT2G36380
13_1026752	Bcin13g02930	AT2G36770
13_1026752	Bcin13g02930	AT2G37470
13_1026752	Bcin13g02930	AT2G37980
13_1026752	Bcin13g02930	AT2G39480
13_1026752	Bcin13g02930	AT2G43150
13_1026752	Bcin13g02930	AT2G43490
13_1026752	Bcin13g02930	AT2G46080
13_1026752	Bcin13g02930	AT2G46320
13_1026752	Bcin13g02930	AT3G01040
13_1026752	Bcin13g02930	AT3G01720
13_1026752	Bcin13g02930	AT3G01980
13_1026752	Bcin13g02930	AT3G04640
13_1026752	Bcin13g02930	AT3G05090
13_1026752	Bcin13g02930	AT3G13380
13_1026752	Bcin13g02930	AT3G19260
13_1026752	Bcin13g02930	AT3G20490
13_1026752	Bcin13g02930	AT3G21140
13_1026752	Bcin13g02930	AT3G26670
13_1026752	Bcin13g02930	AT3G26780
13_1026752	Bcin13g02930	AT3G43240
13_1026752	Bcin13g02930	AT3G47700
13_1026752	Bcin13g02930	AT3G51090
13_1026752	Bcin13g02930	AT3G54620
13_1026752	Bcin13g02930	AT3G55890
13_1026752	Bcin13g02930	AT3G60680
13_1026752	Bcin13g02930	AT3G63380
13_1026752	Bcin13g02930	AT4G03320
13_1026752	Bcin13g02930	AT4G08180
13_1026752	Bcin13g02930	AT4G12070
13_1026752	Bcin13g02930	AT4G12120
13_1026752	Bcin13g02930	AT4G12770
13_1026752	Bcin13g02930	AT4G12780
13_1026752	Bcin13g02930	AT4G14230
13_1026752	Bcin13g02930	AT4G14410
13_1026752	Bcin13g02930	AT4G18050
13_1026752	Bcin13g02930	AT4G18990
13_1026752	Bcin13g02930	AT4G19440
13_1026752	Bcin13g02930	AT4G25070
13_1026752	Bcin13g02930	AT4G25390
13_1026752	Bcin13g02930	AT4G26270
13_1026752	Bcin13g02930	AT4G28550
13_1026752	Bcin13g02930	AT4G32070
13_1026752	Bcin13g02930	AT4G33520
13_1026752	Bcin13g02930	AT4G35620
13_1026752	Bcin13g02930	AT4G35830
13_1026752	Bcin13g02930	AT4G37030
13_1026752	Bcin13g02930	AT4G37390
13_1026752	Bcin13g02930	AT4G37530
13_1026752	Bcin13g02930	AT5G01500
13_1026752	Bcin13g02930	AT5G03490
13_1026752	Bcin13g02930	AT5G04540
13_1026752	Bcin13g02930	AT5G05580
13_1026752	Bcin13g02930	AT5G05780
13_1026752	Bcin13g02930	AT5G13860
13_1026752	Bcin13g02930	AT5G15470
13_1026752	Bcin13g02930	AT5G18490
13_1026752	Bcin13g02930	AT5G22850
13_1026752	Bcin13g02930	AT5G25930
13_1026752	Bcin13g02930	AT5G27380
13_1026752	Bcin13g02930	AT5G38710
13_1026752	Bcin13g02930	AT5G42870
13_1026752	Bcin13g02930	AT5G45900
13_1026752	Bcin13g02930	AT5G49665
13_1026752	Bcin13g02930	AT5G49700
13_1026752	Bcin13g02930	AT5G51770
13_1026752	Bcin13g02930	AT5G54510
13_1026752	Bcin13g02930	AT5G54810
13_1026752	Bcin13g02930	AT5G56870
13_1026752	Bcin13g02930	AT5G57700
13_1026752	Bcin13g02930	AT5G58730
13_1026752	Bcin13g02930	AT5G59430
13_1026752	Bcin13g02930	AT5G59700
13_1026752	Bcin13g02930	AT5G63970
13_1026752	Bcin13g02930	AT5G64230
13_1026752	Bcin13g02930	AT5G67340
16_76596	Bcin16g00010	AT1G76705
16_76596	Bcin16g00010	AT5G40720
16_787512	Bcin16g01950	AT1G02145
16_787512	Bcin16g01950	AT1G03550
16_787512	Bcin16g01950	AT1G04350
16_787512	Bcin16g01950	AT1G04950
16_787512	Bcin16g01950	AT1G06040
16_787512	Bcin16g01950	AT1G06960
16_787512	Bcin16g01950	AT1G07320
16_787512	Bcin16g01950	AT1G08465
16_787512	Bcin16g01950	AT1G10210
16_787512	Bcin16g01950	AT1G10660
16_787512	Bcin16g01950	AT1G12090
16_787512	Bcin16g01950	AT1G12350
16_787512	Bcin16g01950	AT1G12900
16_787512	Bcin16g01950	AT1G13770
16_787512	Bcin16g01950	AT1G17200
16_787512	Bcin16g01950	AT1G18670
16_787512	Bcin16g01950	AT1G19330
16_787512	Bcin16g01950	AT1G19600
16_787512	Bcin16g01950	AT1G19700
16_787512	Bcin16g01950	AT1G21350
16_787512	Bcin16g01950	AT1G24793
16_787512	Bcin16g01950	AT1G24822
16_787512	Bcin16g01950	AT1G24996
16_787512	Bcin16g01950	AT1G25054
16_787512	Bcin16g01950	AT1G25210
16_787512	Bcin16g01950	AT1G26150
16_787512	Bcin16g01950	AT1G26670
16_787512	Bcin16g01950	AT1G27030
16_787512	Bcin16g01950	AT1G27920
16_787512	Bcin16g01950	AT1G28960
16_787512	Bcin16g01950	AT1G29070
16_787512	Bcin16g01950	AT1G30590
16_787512	Bcin16g01950	AT1G30910
16_787512	Bcin16g01950	AT1G32050
16_787512	Bcin16g01950	AT1G33990
16_787512	Bcin16g01950	AT1G34640
16_787512	Bcin16g01950	AT1G35516
16_787512	Bcin16g01950	AT1G44920
16_787512	Bcin16g01950	AT1G48620
16_787512	Bcin16g01950	AT1G49580
16_787512	Bcin16g01950	AT1G51200
16_787512	Bcin16g01950	AT1G52220
16_787512	Bcin16g01950	AT1G52870
16_787512	Bcin16g01950	AT1G53190
16_787512	Bcin16g01950	AT1G55670
16_787512	Bcin16g01950	AT1G60989
16_787512	Bcin16g01950	AT1G62970
16_787512	Bcin16g01950	AT1G63240
16_787512	Bcin16g01950	AT1G64230
16_787512	Bcin16g01950	AT1G64355
16_787512	Bcin16g01950	AT1G64370
16_787512	Bcin16g01950	AT1G64430
16_787512	Bcin16g01950	AT1G64500
16_787512	Bcin16g01950	AT1G64970
16_787512	Bcin16g01950	AT1G65260
16_787512	Bcin16g01950	AT1G68010
16_787512	Bcin16g01950	AT1G68945
16_787512	Bcin16g01950	AT1G69252
16_787512	Bcin16g01950	AT1G69420
16_787512	Bcin16g01950	AT1G70310
16_787512	Bcin16g01950	AT1G70660
16_787512	Bcin16g01950	AT1G71340
16_787512	Bcin16g01950	AT1G71480
16_787512	Bcin16g01950	AT1G71695
16_787512	Bcin16g01950	AT1G74470
16_787512	Bcin16g01950	AT1G74970
16_787512	Bcin16g01950	AT1G75540
16_787512	Bcin16g01950	AT1G75630
16_787512	Bcin16g01950	AT1G75690
16_787512	Bcin16g01950	AT1G78150
16_787512	Bcin16g01950	AT2G02060
16_787512	Bcin16g01950	AT2G02570
16_787512	Bcin16g01950	AT2G05620
16_787512	Bcin16g01950	AT2G14890
16_787512	Bcin16g01950	AT2G14910
16_787512	Bcin16g01950	AT2G18440
16_787512	Bcin16g01950	AT2G18710
16_787512	Bcin16g01950	AT2G20340
16_787512	Bcin16g01950	AT2G21320
16_787512	Bcin16g01950	AT2G21330
16_787512	Bcin16g01950	AT2G21960
16_787512	Bcin16g01950	AT2G22190
16_787512	Bcin16g01950	AT2G24280
16_787512	Bcin16g01950	AT2G25080
16_787512	Bcin16g01950	AT2G26500
16_787512	Bcin16g01950	AT2G27402
16_787512	Bcin16g01950	AT2G29650
16_787512	Bcin16g01950	AT2G30570
16_787512	Bcin16g01950	AT2G31380
16_787512	Bcin16g01950	AT2G31440
16_787512	Bcin16g01950	AT2G32080
16_787512	Bcin16g01950	AT2G33530
16_787512	Bcin16g01950	AT2G33810
16_787512	Bcin16g01950	AT2G33815
16_787512	Bcin16g01950	AT2G34410
16_787512	Bcin16g01950	AT2G34460
16_787512	Bcin16g01950	AT2G34720
16_787512	Bcin16g01950	AT2G34860
16_787512	Bcin16g01950	AT2G35370
16_787512	Bcin16g01950	AT2G37410
16_787512	Bcin16g01950	AT2G38140
16_787512	Bcin16g01950	AT2G39570
16_787512	Bcin16g01950	AT2G39730
16_787512	Bcin16g01950	AT2G39850
16_787512	Bcin16g01950	AT2G41760
16_787512	Bcin16g01950	AT2G43750
16_787512	Bcin16g01950	AT2G43910
16_787512	Bcin16g01950	AT2G44850
16_787512	Bcin16g01950	AT2G46820
16_787512	Bcin16g01950	AT2G46830
16_787512	Bcin16g01950	AT2G47070
16_787512	Bcin16g01950	AT3G01060
16_787512	Bcin16g01950	AT3G02300
16_787512	Bcin16g01950	AT3G02730
16_787512	Bcin16g01950	AT3G02830
16_787512	Bcin16g01950	AT3G04730
16_787512	Bcin16g01950	AT3G06125
16_787512	Bcin16g01950	AT3G07880
16_787512	Bcin16g01950	AT3G09600
16_787512	Bcin16g01950	AT3G10230
16_787512	Bcin16g01950	AT3G11730
16_787512	Bcin16g01950	AT3G12320
16_787512	Bcin16g01950	AT3G15354
16_787512	Bcin16g01950	AT3G16940
16_787512	Bcin16g01950	AT3G22425
16_787512	Bcin16g01950	AT3G26650
16_787512	Bcin16g01950	AT3G27350
16_787512	Bcin16g01950	AT3G45600
16_787512	Bcin16g01950	AT3G45900
16_787512	Bcin16g01950	AT3G47470
16_787512	Bcin16g01950	AT3G48750
16_787512	Bcin16g01950	AT3G50845
16_787512	Bcin16g01950	AT3G51950
16_787512	Bcin16g01950	AT3G53980
16_787512	Bcin16g01950	AT3G54500
16_787512	Bcin16g01950	AT3G54910
16_787512	Bcin16g01950	AT3G55080
16_787512	Bcin16g01950	AT3G57810
16_787512	Bcin16g01950	AT3G58010
16_787512	Bcin16g01950	AT3G62190
16_787512	Bcin16g01950	AT3G62290
16_787512	Bcin16g01950	AT3G62560
16_787512	Bcin16g01950	AT3G62650
16_787512	Bcin16g01950	AT4G00050
16_787512	Bcin16g01950	AT4G01150
16_787512	Bcin16g01950	AT4G02005
16_787512	Bcin16g01950	AT4G02485
16_787512	Bcin16g01950	AT4G02640
16_787512	Bcin16g01950	AT4G02725
16_787512	Bcin16g01950	AT4G03280
16_787512	Bcin16g01950	AT4G03560
16_787512	Bcin16g01950	AT4G09560
16_787512	Bcin16g01950	AT4G09670
16_787512	Bcin16g01950	AT4G10180
16_787512	Bcin16g01950	AT4G12800
16_787512	Bcin16g01950	AT4G17050
16_787512	Bcin16g01950	AT4G17730
16_787512	Bcin16g01950	AT4G19985
16_787512	Bcin16g01950	AT4G21860
16_787512	Bcin16g01950	AT4G21960
16_787512	Bcin16g01950	AT4G24450
16_787512	Bcin16g01950	AT4G25100
16_787512	Bcin16g01950	AT4G26850
16_787512	Bcin16g01950	AT4G28240
16_787512	Bcin16g01950	AT4G28640
16_787512	Bcin16g01950	AT4G29890
16_787512	Bcin16g01950	AT4G31150
16_787512	Bcin16g01950	AT4G32260
16_787512	Bcin16g01950	AT4G33110
16_787512	Bcin16g01950	AT4G34620
16_787512	Bcin16g01950	AT4G35090
16_787512	Bcin16g01950	AT4G35100
16_787512	Bcin16g01950	AT4G35250
16_787512	Bcin16g01950	AT4G35470
16_787512	Bcin16g01950	AT4G35530
16_787512	Bcin16g01950	AT4G37760
16_787512	Bcin16g01950	AT4G38490
16_787512	Bcin16g01950	AT5G01090
16_787512	Bcin16g01950	AT5G02120
16_787512	Bcin16g01950	AT5G02180
16_787512	Bcin16g01950	AT5G02840
16_787512	Bcin16g01950	AT5G03180
16_787512	Bcin16g01950	AT5G03200
16_787512	Bcin16g01950	AT5G03760
16_787512	Bcin16g01950	AT5G04090
16_787512	Bcin16g01950	AT5G04440
16_787512	Bcin16g01950	AT5G04710
16_787512	Bcin16g01950	AT5G05980
16_787512	Bcin16g01950	AT5G06060
16_787512	Bcin16g01950	AT5G06290
16_787512	Bcin16g01950	AT5G07842
16_787512	Bcin16g01950	AT5G08540
16_787512	Bcin16g01950	AT5G09660
16_787512	Bcin16g01950	AT5G09770
16_787512	Bcin16g01950	AT5G10745
16_787512	Bcin16g01950	AT5G14210
16_787512	Bcin16g01950	AT5G15170
16_787512	Bcin16g01950	AT5G17230
16_787512	Bcin16g01950	AT5G17870
16_787512	Bcin16g01950	AT5G19150
16_787512	Bcin16g01950	AT5G19220
16_787512	Bcin16g01950	AT5G19430
16_787512	Bcin16g01950	AT5G19500
16_787512	Bcin16g01950	AT5G20580
16_787512	Bcin16g01950	AT5G22210
16_787512	Bcin16g01950	AT5G22620
16_787512	Bcin16g01950	AT5G23440
16_787512	Bcin16g01950	AT5G24670
16_787512	Bcin16g01950	AT5G26850
16_787512	Bcin16g01950	AT5G27410
16_787512	Bcin16g01950	AT5G28900
16_787512	Bcin16g01950	AT5G30510
16_787512	Bcin16g01950	AT5G37790
16_787512	Bcin16g01950	AT5G39340
16_787512	Bcin16g01950	AT5G41340
16_787512	Bcin16g01950	AT5G42210
16_787512	Bcin16g01950	AT5G42765
16_787512	Bcin16g01950	AT5G44510
16_787512	Bcin16g01950	AT5G46110
16_787512	Bcin16g01950	AT5G47110
16_787512	Bcin16g01950	AT5G48412
16_787512	Bcin16g01950	AT5G49100
16_787512	Bcin16g01950	AT5G50000
16_787512	Bcin16g01950	AT5G55160
16_787512	Bcin16g01950	AT5G55640
16_787512	Bcin16g01950	AT5G56380
16_787512	Bcin16g01950	AT5G57815
16_787512	Bcin16g01950	AT5G58140
16_787512	Bcin16g01950	AT5G58930
16_787512	Bcin16g01950	AT5G62430
16_787512	Bcin16g01950	AT5G62790
16_787512	Bcin16g01950	AT5G62890
16_787512	Bcin16g01950	AT5G63280
16_787512	Bcin16g01950	AT5G64040
16_787512	Bcin16g01950	AT5G64170
16_787512	Bcin16g01950	AT5G65220
16_787512	Bcin16g01950	AT5G65685
16_787512	Bcin16g01950	AT5G66570
16_787512	Bcin16g01950	AT5G66610
16_787512	Bcin16g01950	AT5G67030
2_910858	Bcin02g02480	AT1G32330
2_910858	Bcin02g02480	AT2G22480
2_910858	Bcin02g02480	AT2G41700
2_910858	Bcin02g02480	AT3G60190
2_910858	Bcin02g02480	AT5G04720
2_910858	Bcin02g02480	AT5G63990
3_1695103	Bcin03g05020	AT1G08130
3_1695103	Bcin03g05020	AT1G19300
3_1695103	Bcin03g05020	AT1G24360
3_1695103	Bcin03g05020	AT1G58602
3_1695103	Bcin03g05020	AT1G67680
3_1695103	Bcin03g05020	AT1G70770
3_1695103	Bcin03g05020	AT2G43420
3_1695103	Bcin03g05020	AT3G05350
3_1695103	Bcin03g05020	AT3G06530
3_1695103	Bcin03g05020	AT3G11710
3_1695103	Bcin03g05020	AT3G25770
3_1695103	Bcin03g05020	AT3G59970
3_1695103	Bcin03g05020	AT5G08139
3_1695103	Bcin03g05020	AT5G26710
3_1695103	Bcin03g05020	AT5G60410
3_336467	Bcin03g00960	AT1G02230
3_336467	Bcin03g00960	AT1G04940
3_336467	Bcin03g00960	AT1G05070
3_336467	Bcin03g00960	AT1G07615
3_336467	Bcin03g00960	AT1G08550
3_336467	Bcin03g00960	AT1G13380
3_336467	Bcin03g00960	AT1G19715
3_336467	Bcin03g00960	AT1G19720
3_336467	Bcin03g00960	AT1G20810
3_336467	Bcin03g00960	AT1G28330
3_336467	Bcin03g00960	AT1G29410
3_336467	Bcin03g00960	AT1G32990
3_336467	Bcin03g00960	AT1G35420
3_336467	Bcin03g00960	AT1G42430
3_336467	Bcin03g00960	AT1G42550
3_336467	Bcin03g00960	AT1G43580
3_336467	Bcin03g00960	AT1G51440
3_336467	Bcin03g00960	AT1G52570
3_336467	Bcin03g00960	AT1G60860
3_336467	Bcin03g00960	AT1G64680
3_336467	Bcin03g00960	AT1G64690
3_336467	Bcin03g00960	AT1G66840
3_336467	Bcin03g00960	AT1G72530
3_336467	Bcin03g00960	AT1G75310
3_336467	Bcin03g00960	AT1G78880
3_336467	Bcin03g00960	AT2G02790
3_336467	Bcin03g00960	AT2G03390
3_336467	Bcin03g00960	AT2G19810
3_336467	Bcin03g00960	AT2G22770
3_336467	Bcin03g00960	AT2G32500
3_336467	Bcin03g00960	AT2G33860
3_336467	Bcin03g00960	AT2G34640
3_336467	Bcin03g00960	AT2G35760
3_336467	Bcin03g00960	AT2G36490
3_336467	Bcin03g00960	AT2G39140
3_336467	Bcin03g00960	AT2G40970
3_336467	Bcin03g00960	AT2G41560
3_336467	Bcin03g00960	AT2G42290
3_336467	Bcin03g00960	AT2G46110
3_336467	Bcin03g00960	AT2G46250
3_336467	Bcin03g00960	AT2G48120
3_336467	Bcin03g00960	AT3G03710
3_336467	Bcin03g00960	AT3G05180
3_336467	Bcin03g00960	AT3G06660
3_336467	Bcin03g00960	AT3G09860
3_336467	Bcin03g00960	AT3G10060
3_336467	Bcin03g00960	AT3G14980
3_336467	Bcin03g00960	AT3G15095
3_336467	Bcin03g00960	AT3G16010
3_336467	Bcin03g00960	AT3G16570
3_336467	Bcin03g00960	AT3G17590
3_336467	Bcin03g00960	AT3G19180
3_336467	Bcin03g00960	AT3G22190
3_336467	Bcin03g00960	AT3G26310
3_336467	Bcin03g00960	AT3G26720
3_336467	Bcin03g00960	AT3G27220
3_336467	Bcin03g00960	AT3G47070
3_336467	Bcin03g00960	AT3G47860
3_336467	Bcin03g00960	AT3G49670
3_336467	Bcin03g00960	AT3G50040
3_336467	Bcin03g00960	AT3G53700
3_336467	Bcin03g00960	AT3G53920
3_336467	Bcin03g00960	AT3G56010
3_336467	Bcin03g00960	AT3G56080
3_336467	Bcin03g00960	AT3G57080
3_336467	Bcin03g00960	AT3G62000
3_336467	Bcin03g00960	AT3G63210
3_336467	Bcin03g00960	AT3G63540
3_336467	Bcin03g00960	AT4G00370
3_336467	Bcin03g00960	AT4G00850
3_336467	Bcin03g00960	AT4G02790
3_336467	Bcin03g00960	AT4G09640
3_336467	Bcin03g00960	AT4G10550
3_336467	Bcin03g00960	AT4G10890
3_336467	Bcin03g00960	AT4G13640
3_336467	Bcin03g00960	AT4G14540
3_336467	Bcin03g00960	AT4G14622
3_336467	Bcin03g00960	AT4G14890
3_336467	Bcin03g00960	AT4G19070
3_336467	Bcin03g00960	AT4G21550
3_336467	Bcin03g00960	AT4G23300
3_336467	Bcin03g00960	AT4G25910
3_336467	Bcin03g00960	AT4G26590
3_336467	Bcin03g00960	AT4G28080
3_336467	Bcin03g00960	AT4G28760
3_336467	Bcin03g00960	AT4G31270
3_336467	Bcin03g00960	AT4G35920
3_336467	Bcin03g00960	AT4G37553
3_336467	Bcin03g00960	AT4G37820
3_336467	Bcin03g00960	AT4G38160
3_336467	Bcin03g00960	AT5G01880
3_336467	Bcin03g00960	AT5G02150
3_336467	Bcin03g00960	AT5G04060
3_336467	Bcin03g00960	AT5G11720
3_336467	Bcin03g00960	AT5G13730
3_336467	Bcin03g00960	AT5G13980
3_336467	Bcin03g00960	AT5G14620
3_336467	Bcin03g00960	AT5G16040
3_336467	Bcin03g00960	AT5G17170
3_336467	Bcin03g00960	AT5G21222
3_336467	Bcin03g00960	AT5G23430
3_336467	Bcin03g00960	AT5G23570
3_336467	Bcin03g00960	AT5G24490
3_336467	Bcin03g00960	AT5G25475
3_336467	Bcin03g00960	AT5G27400
3_336467	Bcin03g00960	AT5G27730
3_336467	Bcin03g00960	AT5G38860
3_336467	Bcin03g00960	AT5G42200
3_336467	Bcin03g00960	AT5G43810
3_336467	Bcin03g00960	AT5G44785
3_336467	Bcin03g00960	AT5G47900
3_336467	Bcin03g00960	AT5G51020
3_336467	Bcin03g00960	AT5G51545
3_336467	Bcin03g00960	AT5G52280
3_336467	Bcin03g00960	AT5G53220
3_336467	Bcin03g00960	AT5G55580
3_336467	Bcin03g00960	AT5G55840
3_336467	Bcin03g00960	AT5G57110
3_336467	Bcin03g00960	AT5G57270
3_336467	Bcin03g00960	AT5G58575
3_336467	Bcin03g00960	AT5G60940
3_336467	Bcin03g00960	AT5G61130
4_1633072	Bcin04g04700	AT1G01080
4_1633072	Bcin04g04700	AT1G01160
4_1633072	Bcin04g04700	AT1G01170
4_1633072	Bcin04g04700	AT1G01430
4_1633072	Bcin04g04700	AT1G01860
4_1633072	Bcin04g04700	AT1G02150
4_1633072	Bcin04g04700	AT1G02280
4_1633072	Bcin04g04700	AT1G02290
4_1633072	Bcin04g04700	AT1G02300
4_1633072	Bcin04g04700	AT1G02340
4_1633072	Bcin04g04700	AT1G03000
4_1633072	Bcin04g04700	AT1G03130
4_1633072	Bcin04g04700	AT1G03630
4_1633072	Bcin04g04700	AT1G04240
4_1633072	Bcin04g04700	AT1G04430
4_1633072	Bcin04g04700	AT1G04550
4_1633072	Bcin04g04700	AT1G04590
4_1633072	Bcin04g04700	AT1G05190
4_1633072	Bcin04g04700	AT1G05600
4_1633072	Bcin04g04700	AT1G05870
4_1633072	Bcin04g04700	AT1G06910
4_1633072	Bcin04g04700	AT1G08380
4_1633072	Bcin04g04700	AT1G08910
4_1633072	Bcin04g04700	AT1G08980
4_1633072	Bcin04g04700	AT1G10200
4_1633072	Bcin04g04700	AT1G10510
4_1633072	Bcin04g04700	AT1G10610
4_1633072	Bcin04g04700	AT1G10910
4_1633072	Bcin04g04700	AT1G11430
4_1633072	Bcin04g04700	AT1G11530
4_1633072	Bcin04g04700	AT1G11760
4_1633072	Bcin04g04700	AT1G12250
4_1633072	Bcin04g04700	AT1G12730
4_1633072	Bcin04g04700	AT1G12930
4_1633072	Bcin04g04700	AT1G13860
4_1633072	Bcin04g04700	AT1G14270
4_1633072	Bcin04g04700	AT1G14280
4_1633072	Bcin04g04700	AT1G14345
4_1633072	Bcin04g04700	AT1G14840
4_1633072	Bcin04g04700	AT1G15260
4_1633072	Bcin04g04700	AT1G15730
4_1633072	Bcin04g04700	AT1G16080
4_1633072	Bcin04g04700	AT1G16680
4_1633072	Bcin04g04700	AT1G17350
4_1633072	Bcin04g04700	AT1G17460
4_1633072	Bcin04g04700	AT1G17510
4_1633072	Bcin04g04700	AT1G17850
4_1633072	Bcin04g04700	AT1G17970
4_1633072	Bcin04g04700	AT1G18170
4_1633072	Bcin04g04700	AT1G18660
4_1633072	Bcin04g04700	AT1G18730
4_1633072	Bcin04g04700	AT1G19710
4_1633072	Bcin04g04700	AT1G19835
4_1633072	Bcin04g04700	AT1G20010
4_1633072	Bcin04g04700	AT1G20020
4_1633072	Bcin04g04700	AT1G20650
4_1633072	Bcin04g04700	AT1G20830
4_1633072	Bcin04g04700	AT1G20890
4_1633072	Bcin04g04700	AT1G21600
4_1633072	Bcin04g04700	AT1G22630
4_1633072	Bcin04g04700	AT1G22740
4_1633072	Bcin04g04700	AT1G24148
4_1633072	Bcin04g04700	AT1G24160
4_1633072	Bcin04g04700	AT1G25375
4_1633072	Bcin04g04700	AT1G25440
4_1633072	Bcin04g04700	AT1G26100
4_1633072	Bcin04g04700	AT1G26260
4_1633072	Bcin04g04700	AT1G27190
4_1633072	Bcin04g04700	AT1G27520
4_1633072	Bcin04g04700	AT1G29530
4_1633072	Bcin04g04700	AT1G29560
4_1633072	Bcin04g04700	AT1G30610
4_1633072	Bcin04g04700	AT1G31410
4_1633072	Bcin04g04700	AT1G31420
4_1633072	Bcin04g04700	AT1G31650
4_1633072	Bcin04g04700	AT1G31920
4_1633072	Bcin04g04700	AT1G32200
4_1633072	Bcin04g04700	AT1G32520
4_1633072	Bcin04g04700	AT1G32583
4_1633072	Bcin04g04700	AT1G33240
4_1633072	Bcin04g04700	AT1G33810
4_1633072	Bcin04g04700	AT1G35460
4_1633072	Bcin04g04700	AT1G44000
4_1633072	Bcin04g04700	AT1G44446
4_1633072	Bcin04g04700	AT1G45230
4_1633072	Bcin04g04700	AT1G48300
4_1633072	Bcin04g04700	AT1G48520
4_1633072	Bcin04g04700	AT1G48950
4_1633072	Bcin04g04700	AT1G49010
4_1633072	Bcin04g04700	AT1G49480
4_1633072	Bcin04g04700	AT1G49630
4_1633072	Bcin04g04700	AT1G49975
4_1633072	Bcin04g04700	AT1G50290
4_1633072	Bcin04g04700	AT1G50900
4_1633072	Bcin04g04700	AT1G51630
4_1633072	Bcin04g04700	AT1G52150
4_1633072	Bcin04g04700	AT1G52230
4_1633072	Bcin04g04700	AT1G52590
4_1633072	Bcin04g04700	AT1G53000
4_1633072	Bcin04g04700	AT1G54440
4_1633072	Bcin04g04700	AT1G54730
4_1633072	Bcin04g04700	AT1G54790
4_1633072	Bcin04g04700	AT1G55160
4_1633072	Bcin04g04700	AT1G55260
4_1633072	Bcin04g04700	AT1G55370
4_1633072	Bcin04g04700	AT1G55480
4_1633072	Bcin04g04700	AT1G56050
4_1633072	Bcin04g04700	AT1G56150
4_1633072	Bcin04g04700	AT1G56720
4_1633072	Bcin04g04700	AT1G57790
4_1633072	Bcin04g04700	AT1G59750
4_1633072	Bcin04g04700	AT1G59840
4_1633072	Bcin04g04700	AT1G60010
4_1633072	Bcin04g04700	AT1G60260
4_1633072	Bcin04g04700	AT1G60600
4_1633072	Bcin04g04700	AT1G60950
4_1633072	Bcin04g04700	AT1G60990
4_1633072	Bcin04g04700	AT1G61240
4_1633072	Bcin04g04700	AT1G62630
4_1633072	Bcin04g04700	AT1G62830
4_1633072	Bcin04g04700	AT1G63670
4_1633072	Bcin04g04700	AT1G63980
4_1633072	Bcin04g04700	AT1G64860
4_1633072	Bcin04g04700	AT1G65010
4_1633072	Bcin04g04700	AT1G65032
4_1633072	Bcin04g04700	AT1G65070
4_1633072	Bcin04g04700	AT1G65080
4_1633072	Bcin04g04700	AT1G65420
4_1633072	Bcin04g04700	AT1G65920
4_1633072	Bcin04g04700	AT1G66130
4_1633072	Bcin04g04700	AT1G66980
4_1633072	Bcin04g04700	AT1G67080
4_1633072	Bcin04g04700	AT1G67265
4_1633072	Bcin04g04700	AT1G67490
4_1633072	Bcin04g04700	AT1G67700
4_1633072	Bcin04g04700	AT1G68190
4_1633072	Bcin04g04700	AT1G68585
4_1633072	Bcin04g04700	AT1G68590
4_1633072	Bcin04g04700	AT1G68830
4_1633072	Bcin04g04700	AT1G69200
4_1633072	Bcin04g04700	AT1G69700
4_1633072	Bcin04g04700	AT1G69935
4_1633072	Bcin04g04700	AT1G70100
4_1633072	Bcin04g04700	AT1G70200
4_1633072	Bcin04g04700	AT1G70650
4_1633072	Bcin04g04700	AT1G71260
4_1633072	Bcin04g04700	AT1G71710
4_1633072	Bcin04g04700	AT1G71720
4_1633072	Bcin04g04700	AT1G71970
4_1633072	Bcin04g04700	AT1G72160
4_1633072	Bcin04g04700	AT1G72410
4_1633072	Bcin04g04700	AT1G72480
4_1633072	Bcin04g04700	AT1G72500
4_1633072	Bcin04g04700	AT1G72630
4_1633072	Bcin04g04700	AT1G72640
4_1633072	Bcin04g04700	AT1G72645
4_1633072	Bcin04g04700	AT1G72650
4_1633072	Bcin04g04700	AT1G73210
4_1633072	Bcin04g04700	AT1G73655
4_1633072	Bcin04g04700	AT1G73870
4_1633072	Bcin04g04700	AT1G74520
4_1633072	Bcin04g04700	AT1G75100
4_1633072	Bcin04g04700	AT1G75420
4_1633072	Bcin04g04700	AT1G75460
4_1633072	Bcin04g04700	AT1G76100
4_1633072	Bcin04g04700	AT1G76110
4_1633072	Bcin04g04700	AT1G76720
4_1633072	Bcin04g04700	AT1G77090
4_1633072	Bcin04g04700	AT1G77480
4_1633072	Bcin04g04700	AT1G77990
4_1633072	Bcin04g04700	AT1G78010
4_1633072	Bcin04g04700	AT1G78510
4_1633072	Bcin04g04700	AT1G79880
4_1633072	Bcin04g04700	AT1G80570
4_1633072	Bcin04g04700	AT1G80630
4_1633072	Bcin04g04700	AT2G01760
4_1633072	Bcin04g04700	AT2G02770
4_1633072	Bcin04g04700	AT2G03310
4_1633072	Bcin04g04700	AT2G03550
4_1633072	Bcin04g04700	AT2G03590
4_1633072	Bcin04g04700	AT2G03780
4_1633072	Bcin04g04700	AT2G04270
4_1633072	Bcin04g04700	AT2G04690
4_1633072	Bcin04g04700	AT2G04842
4_1633072	Bcin04g04700	AT2G05210
4_1633072	Bcin04g04700	AT2G05310
4_1633072	Bcin04g04700	AT2G06010
4_1633072	Bcin04g04700	AT2G14090
4_1633072	Bcin04g04700	AT2G14880
4_1633072	Bcin04g04700	AT2G15960
4_1633072	Bcin04g04700	AT2G17695
4_1633072	Bcin04g04700	AT2G18050
4_1633072	Bcin04g04700	AT2G18290
4_1633072	Bcin04g04700	AT2G18850
4_1633072	Bcin04g04700	AT2G19280
4_1633072	Bcin04g04700	AT2G19650
4_1633072	Bcin04g04700	AT2G20180
4_1633072	Bcin04g04700	AT2G20930
4_1633072	Bcin04g04700	AT2G21280
4_1633072	Bcin04g04700	AT2G21385
4_1633072	Bcin04g04700	AT2G21710
4_1633072	Bcin04g04700	AT2G21830
4_1633072	Bcin04g04700	AT2G22540
4_1633072	Bcin04g04700	AT2G22980
4_1633072	Bcin04g04700	AT2G23470
4_1633072	Bcin04g04700	AT2G23520
4_1633072	Bcin04g04700	AT2G23840
4_1633072	Bcin04g04700	AT2G23940
4_1633072	Bcin04g04700	AT2G24120
4_1633072	Bcin04g04700	AT2G24630
4_1633072	Bcin04g04700	AT2G24650
4_1633072	Bcin04g04700	AT2G25000
4_1633072	Bcin04g04700	AT2G25070
4_1633072	Bcin04g04700	AT2G25350
4_1633072	Bcin04g04700	AT2G25710
4_1633072	Bcin04g04700	AT2G25950
4_1633072	Bcin04g04700	AT2G26470
4_1633072	Bcin04g04700	AT2G26900
4_1633072	Bcin04g04700	AT2G26930
4_1633072	Bcin04g04700	AT2G27230
4_1633072	Bcin04g04700	AT2G28310
4_1633072	Bcin04g04700	AT2G28605
4_1633072	Bcin04g04700	AT2G28720
4_1633072	Bcin04g04700	AT2G28870
4_1633072	Bcin04g04700	AT2G29320
4_1633072	Bcin04g04700	AT2G29360
4_1633072	Bcin04g04700	AT2G30280
4_1633072	Bcin04g04700	AT2G30390
4_1633072	Bcin04g04700	AT2G30695
4_1633072	Bcin04g04700	AT2G31040
4_1633072	Bcin04g04700	AT2G31150
4_1633072	Bcin04g04700	AT2G31170
4_1633072	Bcin04g04700	AT2G31190
4_1633072	Bcin04g04700	AT2G31320
4_1633072	Bcin04g04700	AT2G31840
4_1633072	Bcin04g04700	AT2G32180
4_1633072	Bcin04g04700	AT2G32470
4_1633072	Bcin04g04700	AT2G32480
4_1633072	Bcin04g04700	AT2G32970
4_1633072	Bcin04g04700	AT2G33050
4_1633072	Bcin04g04700	AT2G33990
4_1633072	Bcin04g04700	AT2G34300
4_1633072	Bcin04g04700	AT2G34470
4_1633072	Bcin04g04700	AT2G35130
4_1633072	Bcin04g04700	AT2G35260
4_1633072	Bcin04g04700	AT2G36230
4_1633072	Bcin04g04700	AT2G37080
4_1633072	Bcin04g04700	AT2G37450
4_1633072	Bcin04g04700	AT2G37678
4_1633072	Bcin04g04700	AT2G37930
4_1633072	Bcin04g04700	AT2G38370
4_1633072	Bcin04g04700	AT2G38970
4_1633072	Bcin04g04700	AT2G39090
4_1633072	Bcin04g04700	AT2G39280
4_1633072	Bcin04g04700	AT2G40770
4_1633072	Bcin04g04700	AT2G41250
4_1633072	Bcin04g04700	AT2G41820
4_1633072	Bcin04g04700	AT2G42190
4_1633072	Bcin04g04700	AT2G42320
4_1633072	Bcin04g04700	AT2G42450
4_1633072	Bcin04g04700	AT2G42690
4_1633072	Bcin04g04700	AT2G43030
4_1633072	Bcin04g04700	AT2G43560
4_1633072	Bcin04g04700	AT2G44920
4_1633072	Bcin04g04700	AT2G45250
4_1633072	Bcin04g04700	AT2G45850
4_1633072	Bcin04g04700	AT2G47160
4_1633072	Bcin04g04700	AT2G47220
4_1633072	Bcin04g04700	AT2G47940
4_1633072	Bcin04g04700	AT3G01770
4_1633072	Bcin04g04700	AT3G01810
4_1633072	Bcin04g04700	AT3G02180
4_1633072	Bcin04g04700	AT3G03040
4_1633072	Bcin04g04700	AT3G03630
4_1633072	Bcin04g04700	AT3G04160
4_1633072	Bcin04g04700	AT3G04450
4_1633072	Bcin04g04700	AT3G04760
4_1633072	Bcin04g04700	AT3G04890
4_1633072	Bcin04g04700	AT3G04940
4_1633072	Bcin04g04700	AT3G05100
4_1633072	Bcin04g04700	AT3G05160
4_1633072	Bcin04g04700	AT3G05520
4_1633072	Bcin04g04700	AT3G05810
4_1633072	Bcin04g04700	AT3G06980
4_1633072	Bcin04g04700	AT3G07200
4_1633072	Bcin04g04700	AT3G08010
4_1633072	Bcin04g04700	AT3G08740
4_1633072	Bcin04g04700	AT3G09050
4_1633072	Bcin04g04700	AT3G09210
4_1633072	Bcin04g04700	AT3G09980
4_1633072	Bcin04g04700	AT3G10405
4_1633072	Bcin04g04700	AT3G11500
4_1633072	Bcin04g04700	AT3G12345
4_1633072	Bcin04g04700	AT3G12685
4_1633072	Bcin04g04700	AT3G13062
4_1633072	Bcin04g04700	AT3G13120
4_1633072	Bcin04g04700	AT3G13360
4_1633072	Bcin04g04700	AT3G14150
4_1633072	Bcin04g04700	AT3G14410
4_1633072	Bcin04g04700	AT3G14930
4_1633072	Bcin04g04700	AT3G15570
4_1633072	Bcin04g04700	AT3G16000
4_1633072	Bcin04g04700	AT3G16260
4_1633072	Bcin04g04700	AT3G16750
4_1633072	Bcin04g04700	AT3G17170
4_1633072	Bcin04g04700	AT3G17310
4_1633072	Bcin04g04700	AT3G17470
4_1633072	Bcin04g04700	AT3G17930
4_1633072	Bcin04g04700	AT3G18390
4_1633072	Bcin04g04700	AT3G19000
4_1633072	Bcin04g04700	AT3G19400
4_1633072	Bcin04g04700	AT3G19515
4_1633072	Bcin04g04700	AT3G19800
4_1633072	Bcin04g04700	AT3G19810
4_1633072	Bcin04g04700	AT3G19850
4_1633072	Bcin04g04700	AT3G20230
4_1633072	Bcin04g04700	AT3G20440
4_1633072	Bcin04g04700	AT3G20550
4_1633072	Bcin04g04700	AT3G20820
4_1633072	Bcin04g04700	AT3G21060
4_1633072	Bcin04g04700	AT3G21100
4_1633072	Bcin04g04700	AT3G21465
4_1633072	Bcin04g04700	AT3G22104
4_1633072	Bcin04g04700	AT3G22150
4_1633072	Bcin04g04700	AT3G23050
4_1633072	Bcin04g04700	AT3G23070
4_1633072	Bcin04g04700	AT3G23640
4_1633072	Bcin04g04700	AT3G23700
4_1633072	Bcin04g04700	AT3G25530
4_1633072	Bcin04g04700	AT3G25717
4_1633072	Bcin04g04700	AT3G25805
4_1633072	Bcin04g04700	AT3G25920
4_1633072	Bcin04g04700	AT3G26070
4_1633072	Bcin04g04700	AT3G26710
4_1633072	Bcin04g04700	AT3G27420
4_1633072	Bcin04g04700	AT3G27850
4_1633072	Bcin04g04700	AT3G28040
4_1633072	Bcin04g04700	AT3G28130
4_1633072	Bcin04g04700	AT3G28140
4_1633072	Bcin04g04700	AT3G29185
4_1633072	Bcin04g04700	AT3G29290
4_1633072	Bcin04g04700	AT3G43540
4_1633072	Bcin04g04700	AT3G43670
4_1633072	Bcin04g04700	AT3G43790
4_1633072	Bcin04g04700	AT3G44890
4_1633072	Bcin04g04700	AT3G45310
4_1633072	Bcin04g04700	AT3G45780
4_1633072	Bcin04g04700	AT3G45850
4_1633072	Bcin04g04700	AT3G46990
4_1633072	Bcin04g04700	AT3G47450
4_1633072	Bcin04g04700	AT3G48670
4_1633072	Bcin04g04700	AT3G48710
4_1633072	Bcin04g04700	AT3G49140
4_1633072	Bcin04g04700	AT3G49250
4_1633072	Bcin04g04700	AT3G49470
4_1633072	Bcin04g04700	AT3G50430
4_1633072	Bcin04g04700	AT3G50440
4_1633072	Bcin04g04700	AT3G50820
4_1633072	Bcin04g04700	AT3G51075
4_1633072	Bcin04g04700	AT3G51270
4_1633072	Bcin04g04700	AT3G51510
4_1633072	Bcin04g04700	AT3G52150
4_1633072	Bcin04g04700	AT3G52170
4_1633072	Bcin04g04700	AT3G52380
4_1633072	Bcin04g04700	AT3G52905
4_1633072	Bcin04g04700	AT3G53460
4_1633072	Bcin04g04700	AT3G53470
4_1633072	Bcin04g04700	AT3G53760
4_1633072	Bcin04g04700	AT3G53850
4_1633072	Bcin04g04700	AT3G54050
4_1633072	Bcin04g04700	AT3G54290
4_1633072	Bcin04g04700	AT3G54790
4_1633072	Bcin04g04700	AT3G56290
4_1633072	Bcin04g04700	AT3G56480
4_1633072	Bcin04g04700	AT3G56650
4_1633072	Bcin04g04700	AT3G57040
4_1633072	Bcin04g04700	AT3G57050
4_1633072	Bcin04g04700	AT3G57320
4_1633072	Bcin04g04700	AT3G57470
4_1633072	Bcin04g04700	AT3G57930
4_1633072	Bcin04g04700	AT3G58200
4_1633072	Bcin04g04700	AT3G58220
4_1633072	Bcin04g04700	AT3G59060
4_1633072	Bcin04g04700	AT3G59110
4_1633072	Bcin04g04700	AT3G59320
4_1633072	Bcin04g04700	AT3G60320
4_1633072	Bcin04g04700	AT3G60370
4_1633072	Bcin04g04700	AT3G61220
4_1633072	Bcin04g04700	AT3G61700
4_1633072	Bcin04g04700	AT3G61870
4_1633072	Bcin04g04700	AT3G62030
4_1633072	Bcin04g04700	AT3G62080
4_1633072	Bcin04g04700	AT3G62750
4_1633072	Bcin04g04700	AT3G63170
4_1633072	Bcin04g04700	AT4G01330
4_1633072	Bcin04g04700	AT4G02020
4_1633072	Bcin04g04700	AT4G02260
4_1633072	Bcin04g04700	AT4G02770
4_1633072	Bcin04g04700	AT4G02920
4_1633072	Bcin04g04700	AT4G03935
4_1633072	Bcin04g04700	AT4G04040
4_1633072	Bcin04g04700	AT4G04350
4_1633072	Bcin04g04700	AT4G08280
4_1633072	Bcin04g04700	AT4G09040
4_1633072	Bcin04g04700	AT4G09350
4_1633072	Bcin04g04700	AT4G09620
4_1633072	Bcin04g04700	AT4G09650
4_1633072	Bcin04g04700	AT4G09730
4_1633072	Bcin04g04700	AT4G09890
4_1633072	Bcin04g04700	AT4G10470
4_1633072	Bcin04g04700	AT4G11410
4_1633072	Bcin04g04700	AT4G11900
4_1633072	Bcin04g04700	AT4G11970
4_1633072	Bcin04g04700	AT4G12560
4_1633072	Bcin04g04700	AT4G12990
4_1633072	Bcin04g04700	AT4G13100
4_1633072	Bcin04g04700	AT4G13220
4_1633072	Bcin04g04700	AT4G13495
4_1633072	Bcin04g04700	AT4G13670
4_1633072	Bcin04g04700	AT4G13810
4_1633072	Bcin04g04700	AT4G13830
4_1633072	Bcin04g04700	AT4G13970
4_1633072	Bcin04g04700	AT4G14510
4_1633072	Bcin04g04700	AT4G14620
4_1633072	Bcin04g04700	AT4G14720
[truncated: 1,585 more rows]
